# Supplementary material for: Regulatory mechanisms of testosterone-stimulated song in the sensorimotor nucleus HVC of female songbirds
Source: PubMed Central journal article supplement (PMC4261767; doi:10.1186/s12868-014-0128-0), 2014-12-02

Control

Testosterone

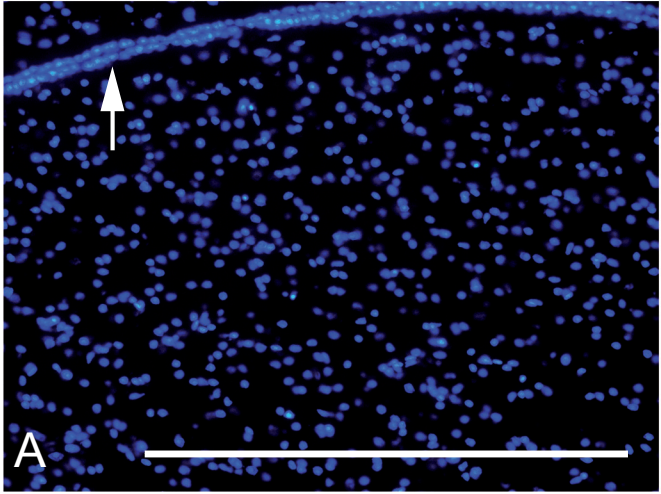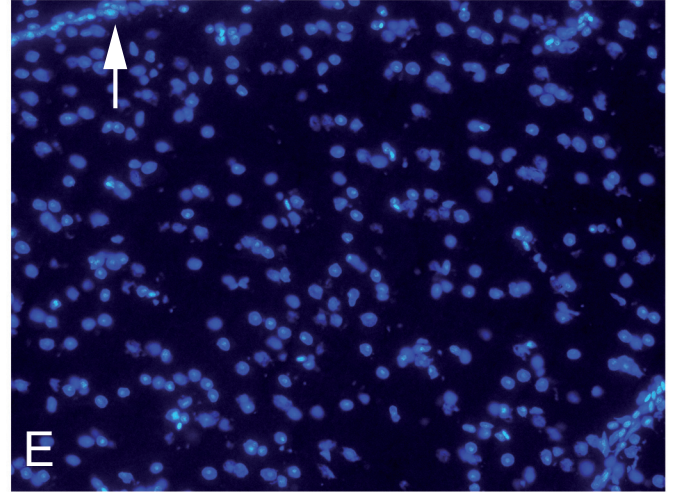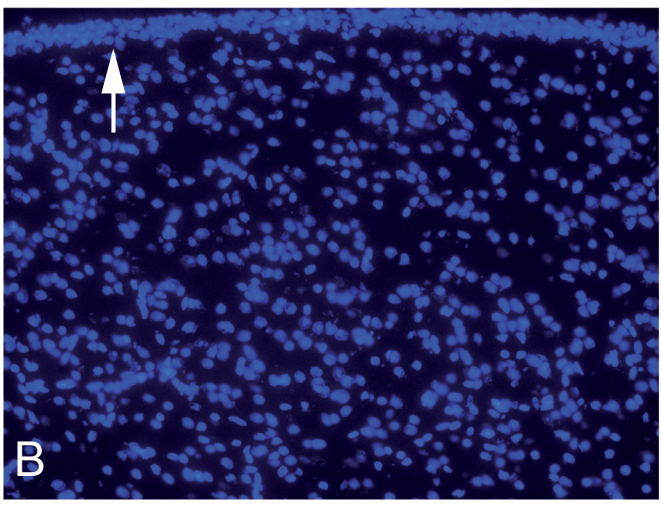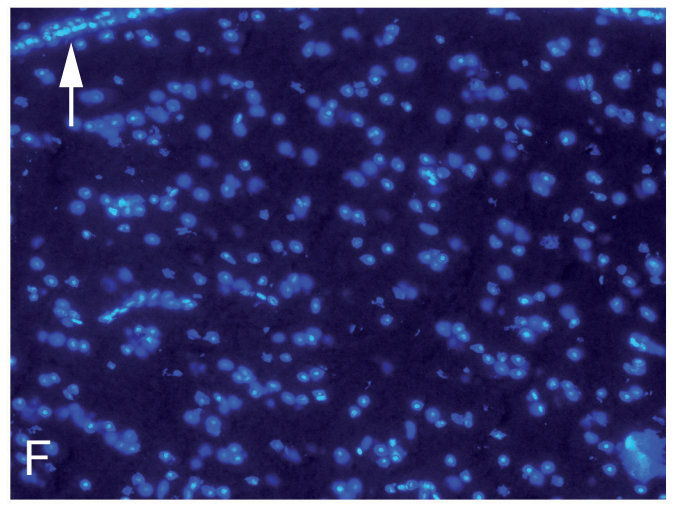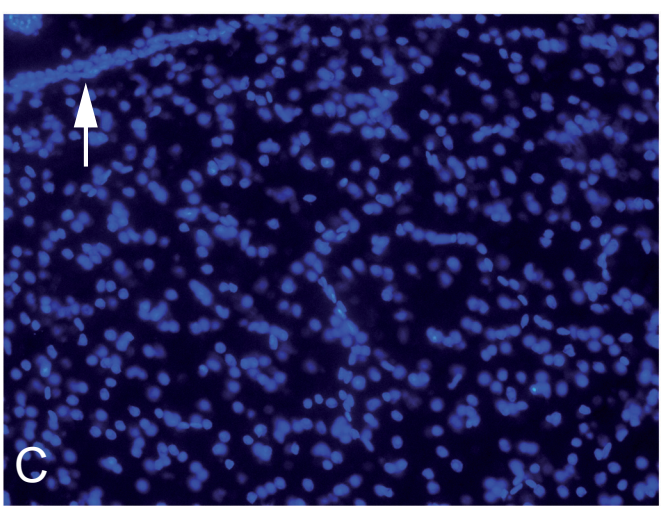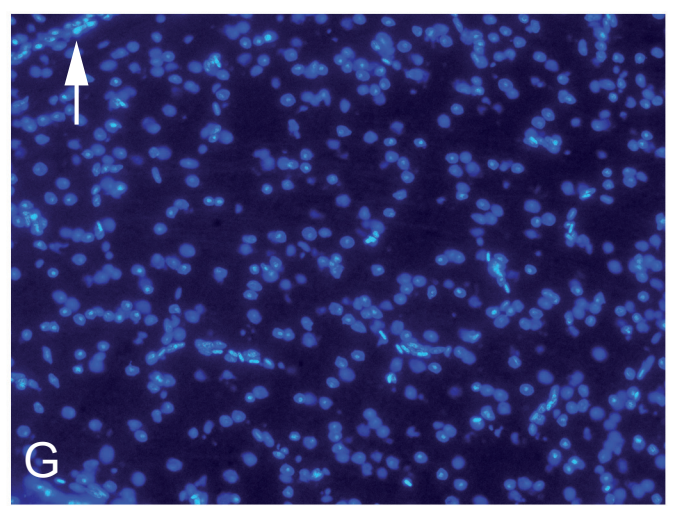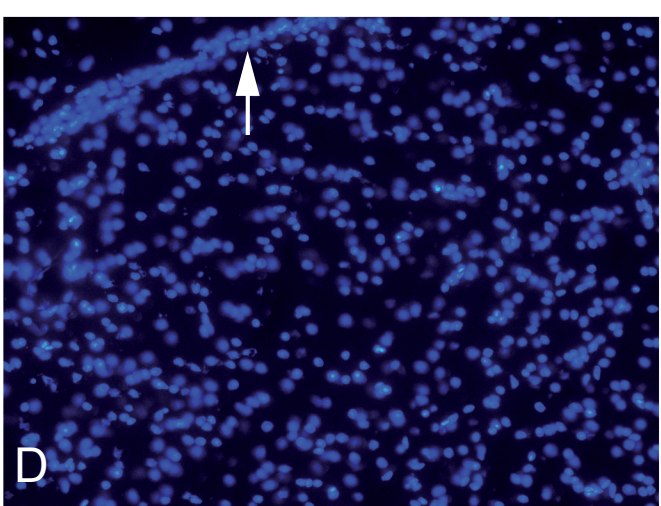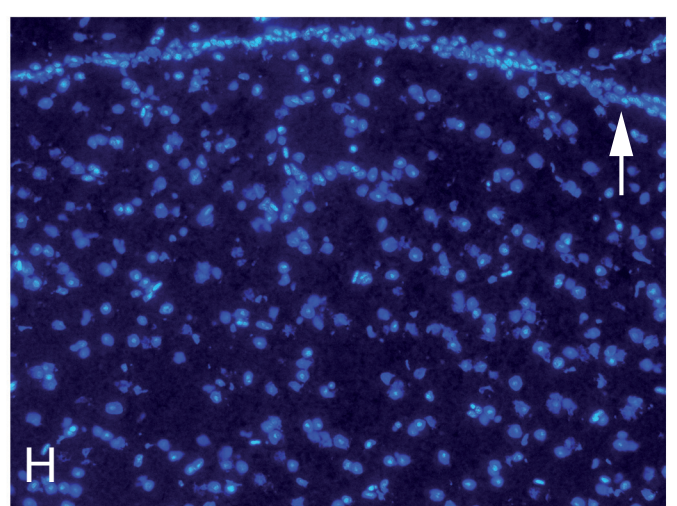

Supplement: 12868_2014_128_MOESM2_ESM.pdf [file 12868_2014_128_MOESM2_ESM.pdf]
