# Supplementary material for: Regulatory mechanisms of testosterone-stimulated song in the sensorimotor nucleus HVC of female songbirds
Source: PubMed Central journal article supplement (PMC4261767; doi:10.1186/s12868-014-0128-0), 2014-12-02
Supplement: 12868_2014_128_MOESM3_ESM.pdf [file 12868_2014_128_MOESM3_ESM.pdf]

A

| Up-regulated |             | Down-regulated |             |
|--------------|-------------|----------------|-------------|
| Symbol       | Fold change | Symbol         | Fold change |
| ABCB1        | 1.693490625 | A2M            | 1.815038329 |
| ABCC2        | 1.693490625 | ABCA1          | 1.741101141 |
| ACLY         | 1.658639092 | ABCC8          | 1.905276006 |
| ACSBG2       | 1.945309895 | ABCC9          | 1.802500955 |
| ACTN2        | 2.361985323 | ACOX2          | 1.635804093 |
| ADAM23       | 1.892115293 | ADAMTS5        | 1.729074488 |
| ADAMTS9      | 1.853176124 | AKAP9          | 1.705269761 |
| ADAMTS20     | 1.729074463 | ALDH3A2        | 1.765405984 |
| ADD3         | 1.647182035 | ALS2CR8        | 1.602139763 |
| ADSSL1       | 1.717130873 | ANKDD1A        | 1.753211446 |
| AFF3         | 1.777685362 | ANKFN1         | 1.681792831 |
| ALDH1A2      | 2.203810232 | ANKRD5         | 1.802500955 |
| AOAH         | 1.729074463 | ANKS1B         | 1.658639114 |
| AR           | 1.972465409 | ANXA7          | 1.635804093 |
| ARHGAP31     | 1.8276629   | ARHGAP32       | 1.67017585  |
| ARPP19       | 1.647182035 | ARHGEF5        | 1.647182067 |
| ASTN2        | 1.879045498 | ASAH2          | 1.802500955 |
| ATP2A3       | 2.099433367 | ATP1A1         | 1.693490614 |
| ATP5A1       | 1.647182035 | ATF7IP         | 1.905276006 |
| ATP6V1C1     | 2.234574276 | ATP9A          | 1.658639114 |
| BACE2        | 1.729074463 | ATP10D         | 1.624504779 |
| BDNF         | 2.234574276 | B3GNTL1        | 1.705269761 |
| BRS3         | 2.084931522 | BAZ2B          | 1.693490614 |
| C18orf1      | 1.8276629   | BBX            | 1.647182067 |
| C4A          | 1.753211443 | BCAS3          | 1.647182067 |
| CADPS2       | 1.945309895 | BICC1          | 1.635804093 |
| CAMK1D       | 1.705269784 | BOK            | 1.647182067 |
| CAR15        | 1.741101127 | BRCA2          | 1.879045533 |
| CASK         | 1.624504793 | C2orf43        | 1.815038329 |
| CCDC109A     | 1.613283518 | C5orf4         | 1.729074488 |
| CCDC134      | 1.693490625 | C5orf41        | 1.765405984 |
| CDH5         | 1.658639092 | C6orf103       | 1.717130839 |
| CHGB         | 1.815038311 | C6orf170       | 1.705269761 |
| CHST9        | 2.0139111   | C7orf63        | 1.802500955 |

|         |             |          |             |
|---------|-------------|----------|-------------|
| CNTNAP1 | 1.693490625 | C14orf49 | 1.681792831 |
| COL4A1  | 1.972465409 | C16orf70 | 1.765405984 |
| COL4A2  | 1.879045498 | CABIN1   | 1.635804093 |
| COL4A5  | 1.879045498 | CAMK1G   | 1.729074488 |
| COL6A1  | 2.566851795 | CBFA2T2  | 1.67017585  |
| COL6A3  | 1.866065983 | CC2D2A   | 1.681792831 |
| COL19A1 | 1.931872658 | CD2AP    | 1.681792831 |
| CRHBP   | 2.867910496 | CDH9     | 1.624504779 |
| CXCL14  | 1.693490625 | CDH23    | 1.67017585  |
| CXXC5   | 1.705269784 | CDK19    | 1.635804093 |
| CYB5A   | 1.635804117 | CDKL1    | 1.753211446 |
| DAPK1   | 1.670175839 | CDON     | 1.741101141 |
| DBC1    | 1.729074463 | CELSR1   | 1.681792831 |
| DCTN3   | 1.705269784 | CEP110   | 1.658639114 |
| DHCR7   | 1.705269784 | CEP112   | 1.647182067 |
| DHX29   | 1.705269784 | CHD2     | 1.613283516 |
| DHX35   | 1.658639092 | CHD5     | 1.765405984 |
| DIO2    | 2.281527432 | CHD9     | 1.840375295 |
| DNAJB5  | 2.329467173 | CHL1     | 1.635804093 |
| DOK7    | 1.945309895 | CLCN6    | 1.729074488 |
| DOS     | 1.765405993 | CNNM1    | 1.635804093 |
| DOT1L   | 1.658639092 | CNTN3    | 1.624504779 |
| DPP4    | 1.918528239 | CNTNAP5  | 1.624504779 |
| DPP10   | 1.647182035 | COL4A4   | 1.67017585  |
| DPT     | 2.02791896  | COL12A1  | 1.790050109 |
| DUSP5   | 2.313376368 | COL27A1  | 1.753211446 |
| DUSP6   | 1.8276629   | CORIN    | 1.635804093 |
| DUSP7   | 1.777685362 | CRHR1    | 1.681792831 |
| EDA2R   | 2.143546925 | CSMD2    | 1.705269761 |
| EMCN    | 2.02791896  | CTR9     | 1.765405984 |
| ESYT3   | 1.765405993 | CUBN     | 1.777685342 |
| F13A1   | 1.945309895 | CYTH1    | 1.777685342 |
| FABP7   | 1.918528239 | DDX51    | 1.705269761 |
| FADS2   | 3.138336392 | DENND1A  | 1.840375295 |
| FAM13A  | 1.853176124 | DENND4A  | 1.613283516 |
| FAM13C  | 1.777685362 | DEPDC5   | 1.635804093 |
| FAM126A | 1.741101127 | DMTF1    | 1.624504779 |

|          |             |           |             |
|----------|-------------|-----------|-------------|
| FANCA    | 2.099433367 | DMXL2     | 1.945309866 |
| FAT1     | 1.729074463 | DNAH1     | 1.705269761 |
| FDFT1    | 1.624504793 | DNAH3     | 1.67017585  |
| FGFR2    | 1.693490625 | DNAH5     | 1.67017585  |
| FKBP5    | 1.815038311 | DNAH9     | 1.802500955 |
| FN1      | 1.815038311 | DNAH10    | 1.729074488 |
| FOSL2    | 1.705269784 | DNAH12    | 1.693490614 |
| GFRA1    | 2.234574276 | DOCK4     | 1.635804093 |
| GGT5     | 1.741101127 | DOCK10    | 1.635804093 |
| GPC3     | 1.931872658 | DOPEY2    | 1.705269761 |
| GRIN2A   | 1.681792831 | DSCAM     | 1.635804093 |
| HECTD2   | 1.705269784 | DST       | 1.658639114 |
| HEG1     | 1.777685362 | ECEL1     | 1.777685342 |
| HERC2    | 2.694467154 | EEF2K     | 1.717130839 |
| HMGCR    | 1.681792831 | EFEMP1    | 1.624504779 |
| HMGCS1   | 1.741101127 | EGFR      | 1.705269761 |
| HOMER1   | 1.681792831 | EIF4ENIF1 | 1.647182067 |
| HSD17B12 | 1.931872658 | EIF2AK4   | 1.753211446 |
| HTR7     | 1.777685362 | EML6      | 1.67017585  |
| IARS     | 1.670175839 | ENOX1     | 2.20381021  |
| IDI1     | 1.802500925 | EP300     | 1.613283516 |
| IFRD1    | 1.729074463 | EP400     | 1.658639114 |
| IGF2     | 1.958840595 | EPB41L2   | 1.777685342 |
| IGSF9B   | 1.717130873 | EPB41L3   | 1.717130839 |
| IMPA1    | 1.670175839 | EPB41L4B  | 1.681792831 |
| INCENP   | 1.717130873 | EPB41L5   | 1.705269761 |
| INF2     | 1.753211443 | ERBB4     | 1.602139763 |
| INSIG1   | 1.741101127 | EYA1      | 1.717130839 |
| IPO11    | 1.905275996 | EZH1      | 1.658639114 |
| ITGA1    | 1.815038311 | F3        | 1.765405984 |
| ITPR3    | 1.658639092 | FAM70B    | 1.815038329 |
| JARID2   | 1.802500925 | FAM184A   | 1.802500955 |
| KCNK16   | 1.853176124 | FAM196A   | 1.635804093 |
| KDR      | 2.042024251 | FARP2     | 1.729074488 |
| KIAA1217 | 1.624504793 | FAT3      | 2.219138907 |
| KIAA1239 | 1.729074463 | FBN2      | 1.802500955 |
| KITLG    | 1.693490625 | FCGBP     | 1.840375295 |

|          |             |          |             |
|----------|-------------|----------|-------------|
| KLHL4    | 1.624504793 | FNBP1L   | 1.931872642 |
| KRT1     | 2.219138944 | FOXP1    | 1.717130839 |
| KTN1     | 2.514026749 | FOXP2    | 1.681792831 |
| LAMA2    | 1.658639092 | FRAS1    | 1.67017585  |
| LAMA4    | 1.765405993 | FRMPD2   | 1.693490614 |
| LMBRD1   | 3.095129987 | FRMPD3   | 1.790050109 |
| LMBRD2   | 1.658639092 | GAB3     | 1.705269761 |
| LRRK1    | 1.945309895 | GABRB1   | 1.729074488 |
| LTA4H    | 1.658639092 | GATSL2   | 1.693490614 |
| LY75     | 1.802500925 | GHR      | 1.753211446 |
| MACF1    | 2.02791896  | GLI3     | 1.681792831 |
| MAP4K4   | 1.705269784 | GPLD1    | 1.658639114 |
| MAPK6    | 2.188587403 | GPR98    | 1.693490614 |
| MAPK8IP1 | 1.741101127 | GPR123   | 1.681792831 |
| MAPK11   | 1.729074463 | GRAMD1C  | 1.717130839 |
| MAPK13   | 2.158456473 | GTF2H4   | 1.693490614 |
| MET      | 1.958840595 | GUCY1B2  | 1.681792831 |
| MMRN2    | 1.986184991 | HDAC4    | 1.624504779 |
| MPP1     | 3.073750363 | HELZ     | 1.658639114 |
| MPP6     | 1.705269784 | HHIP     | 1.866065952 |
| MYH9     | 1.681792831 | HMCN2    | 1.753211446 |
| MYO5B    | 1.693490625 | HNF4A    | 1.753211446 |
| MYO10    | 2.394957409 | IFT140   | 1.658639114 |
| NAA35    | 1.635804117 | IGF1R    | 1.717130839 |
| NEFM     | 2.084931439 | INPP5B   | 1.635804093 |
| NEK5     | 1.705269784 | INTS2    | 1.67017585  |
| NETO1    | 1.602139755 | INTU     | 1.693490614 |
| NID1     | 1.853176124 | ITGA8    | 1.705269761 |
| NPY      | 1.972465409 | KCNH7    | 1.67017585  |
| NRK      | 1.705269784 | KDM2B    | 1.658639114 |
| NRN1     | 1.717130873 | KIAA0430 | 1.693490614 |
| NRP1     | 1.705269784 | KIAA0564 | 1.693490614 |
| NSDHL    | 1.741101127 | KIAA1109 | 1.681792831 |
| NSUN2    | 1.624504793 | KIAA1244 | 1.613283516 |
| NUP62CL  | 1.635804117 | KIAA1409 | 1.717130839 |
| OBFC2A   | 1.658639092 | KIF1B    | 1.624504779 |
| ODZ1     | 2.462288827 | KIT      | 1.717130839 |

|         |             |         |             |
|---------|-------------|---------|-------------|
| OSBPL8  | 1.866065983 | LAMA3   | 1.705269761 |
| PDCD6   | 1.729074463 | LAMA5   | 1.681792831 |
| PDE4D   | 2.02791896  | LGR5    | 1.717130839 |
| PDE5A   | 2.0139111   | LPHN2   | 1.658639114 |
| PECAM1  | 1.753211443 | LRBA    | 1.729074488 |
| PGF     | 2.158456473 | LRMP    | 1.717130839 |
| PI4KA   | 2.928171392 | LRP1B   | 1.67017585  |
| PIK3C2A | 2.584705661 | LRP2    | 1.705269761 |
| PIM3    | 1.658639092 | LRRC7   | 2.549121297 |
| PITPNC1 | 1.635804117 | LRRCC1  | 1.67017585  |
| PLEKHO2 | 1.705269784 | LRRK2   | 1.681792831 |
| PLIN2   | 1.693490625 | LYPD1   | 1.613283516 |
| PLK3    | 1.741101127 | MAP7    | 1.905276006 |
| POLQ    | 1.8276629   | MC4R    | 1.972465435 |
| PSMA3   | 1.635804117 | MDN1    | 1.705269761 |
| PTP4A3  | 1.879045498 | MED12   | 1.753211446 |
| PTPRB   | 1.765405993 | MED13L  | 1.624504779 |
| PYGB    | 1.790050142 | MED15   | 1.840375295 |
| RASGRP1 | 1.729074463 | MFGE8   | 1.918528235 |
| RDH10   | 1.853176124 | MGAT5B  | 1.681792831 |
| RGL1    | 1.802500925 | MIER2   | 1.972465435 |
| RGS9    | 1.840375301 | MLL     | 1.693490614 |
| RHBDF1  | 1.670175839 | MLL3    | 1.613283516 |
| RHOB    | 1.777685362 | MOXD1   | 1.892115315 |
| RRAD    | 1.945309895 | MPPED1  | 1.647182067 |
| RRP9    | 1.613283518 | MRVI1   | 1.790050109 |
| SCGN    | 1.892115293 | MTA3    | 1.647182067 |
| SDC1    | 1.8276629   | MYCBP2  | 1.729074488 |
| SEMA3C  | 1.777685362 | MYH3    | 1.693490614 |
| SIDT1   | 1.670175839 | MYO1E   | 1.681792831 |
| SLC6A17 | 1.945309868 | MYOF    | 1.705269761 |
| SLC30A5 | 1.717130873 | NCKIPSD | 1.602139763 |
| SLC35F3 | 1.777685362 | NCOA2   | 1.647182067 |
| SLC40A1 | 1.945309895 | NCOA6   | 1.840375295 |
| SNAI2   | 2.0139111   | NEDD4   | 1.67017585  |
| SORCS3  | 1.741101127 | NOS1    | 1.613283516 |
| SPAG9   | 2.29739671  | NOV     | 1.693490614 |

|          |             |         |             |
|----------|-------------|---------|-------------|
| SPHKAP   | 1.658639092 | NPR2    | 1.693490614 |
| SPINK5   | 2.143546925 | NTSR1   | 1.777685342 |
| SPTAN1   | 2.143546925 | OBSCN   | 1.705269761 |
| SRD5A2   | 1.905275996 | OSBPL5  | 1.635804093 |
| SRPR     | 1.635804117 | OTOG    | 1.717130839 |
| SSBP3    | 2.394957409 | OTOGL   | 2.013911087 |
| ST6GAL2  | 1.8276629   | PALLD   | 1.658639114 |
| STARD13  | 1.790050142 | PCDP1   | 1.693490614 |
| STC2     | 1.931872658 | PDE7B   | 1.624504779 |
| STOML2   | 1.670175839 | PER2    | 1.693490614 |
| SUPV3L1  | 1.853176124 | PEX5L   | 2.20381021  |
| SV2B     | 2.29739671  | PHIP    | 1.918528235 |
| SYNM     | 1.790050142 | PHKA2   | 1.693490614 |
| TBX3     | 1.905275996 | PITPNM2 | 1.693490614 |
| THBS1    | 1.693490625 | PKHD1   | 1.729074488 |
| TMC3     | 1.931872658 | PLCH2   | 1.717130839 |
| TMEM201  | 2.219138944 | PLEKHA7 | 1.647182067 |
| TMSB4X   | 1.717130873 | PLXNC1  | 1.705269761 |
| TNFRSF1A | 1.8276629   | PLXND1  | 1.705269761 |
| TNFSF13B | 2.907945035 | PMS1    | 1.705269761 |
| TRHR     | 2.0139111   | POLA1   | 1.741101141 |
| TRPC4    | 1.802500925 | POU2F1  | 1.624504779 |
| TRPM2    | 1.717130873 | PPFIA1  | 1.765405984 |
| TRPM8    | 1.931872658 | PPFIBP1 | 1.67017585  |
| UBXN2A   | 1.931872658 | PREPL   | 1.693490614 |
| UNC13C   | 1.905275996 | PRKAR1B | 1.741101141 |
| USP12    | 1.681792831 | PRKDC   | 1.705269761 |
| USP15    | 1.635804117 | PRKG2   | 1.681792831 |
| UTS2D    | 2.203810232 | PTPN13  | 1.717130839 |
| VCL      | 1.635804117 | RAB32   | 1.717130839 |
| VEGFA    | 1.802500925 | RASD2   | 1.705269761 |
| WDR36    | 1.8276629   | RBL2    | 1.729074488 |
| WDR41    | 1.705269784 | REPS2   | 1.681792831 |
| WFDC1    | 2.128740365 | RFX2    | 1.693490614 |
| WNT7B    | 2.411615655 | RGS22   | 1.741101141 |
| XDH      | 1.866065983 | RNF2    | 2.78948737  |
| ZZEF1    | 1.647182035 | RNF123  | 1.729074488 |

|            |             |
|------------|-------------|
| RPAP1      | 1.658639114 |
| RPS6KA2    | 1.729074488 |
| RSPO3      | 1.693490614 |
| RUFY1      | 1.753211446 |
| SCML2      | 2.027918933 |
| SCN2A      | 1.958840634 |
| SCN3B      | 1.647182067 |
| SEMA3D     | 1.765405984 |
| SERINC4    | 2.042024211 |
| SETD1B     | 1.647182067 |
| SHANK2     | 1.635804093 |
| SLC43A2    | 1.658639114 |
| SLIT1      | 1.67017585  |
| SMAD1      | 1.635804093 |
| SMG1       | 1.613283516 |
| SNED1      | 1.67017585  |
| SPATA13    | 1.635804093 |
| ST6GALNAC5 | 1.658639114 |
| STAB2      | 1.790050109 |
| SUPT3H     | 1.67017585  |
| SYNE1      | 1.635804093 |
| TBC1D9     | 2.114036144 |
| TCF12      | 1.647182067 |
| TCP11L2    | 1.658639114 |
| TEF        | 1.802500955 |
| TGFBR3     | 1.67017585  |
| THADA      | 1.635804093 |
| TIAM1      | 1.647182067 |
| TIAM2      | 1.741101141 |
| TLL1       | 1.658639114 |
| TLL2       | 1.753211446 |
| TNRC6C     | 1.602139763 |
| TNRC18     | 1.647182067 |
| TP53I11    | 1.827662906 |
| TRPV1      | 1.67017585  |
| TTC21B     | 1.693490614 |
| ULK4       | 1.729074488 |

|         |             |
|---------|-------------|
| UNC5C   | 1.717130839 |
| UNC80   | 1.681792831 |
| USH1C   | 1.790050109 |
| USH2A   | 1.693490614 |
| USP34   | 1.905276006 |
| UTRN    | 1.635804093 |
| VAC14   | 1.67017585  |
| VPS13C  | 1.693490614 |
| VSP13D  | 1.624504779 |
| WASL    | 1.635804093 |
| WDR19   | 1.777685342 |
| WDR52   | 1.815038329 |
| WDR69   | 1.741101141 |
| WIF1    | 1.717130839 |
| WIPF3   | 1.777685342 |
| XRN1    | 1.67017585  |
| YTHDC1  | 1.918528235 |
| ZC3H7B  | 1.681792831 |
| ZFC3H1  | 1.790050109 |
| ZFP704  | 1.658639114 |
| ZFYVE26 | 1.624504779 |
| ZMIZ1   | 1.681792831 |
| ZMYND8  | 1.658639114 |
| ZNF236  | 1.635804093 |
| ZNF384  | 1.602139763 |

## B

| <b>Fold change</b> | <b>Up-regulated</b> | <b>Down-regulated</b> |
|--------------------|---------------------|-----------------------|
| > 3                | 3                   | 0                     |
| 2.5 - 3.0          | 7                   | 2                     |
| 2.0 - 2.5          | 37                  | 7                     |
| 1.8 - 2.0          | 61                  | 33                    |
| 1.6 - 1.8          | 111                 | 239                   |
