# Supplementary material for: Regulatory mechanisms of testosterone-stimulated song in the sensorimotor nucleus HVC of female songbirds
Source: PubMed Central journal article supplement (PMC4261767; doi:10.1186/s12868-014-0128-0), 2014-12-02
Supplement: 12868_2014_128_MOESM4_ESM.pdf [file 12868_2014_128_MOESM4_ESM.pdf]

| Functional category              | Zebra finch transcripts                                             |                    |             | Human orthologous genes                                       |                                                                                                         |
|----------------------------------|---------------------------------------------------------------------|--------------------|-------------|---------------------------------------------------------------|---------------------------------------------------------------------------------------------------------|
|                                  | Gene                                                                | Accession number   | Fold change | Symbol                                                        | Examples of cellular function/role in brain tissue                                                      |
| Signal transduction              | Membrane protein, palmitoylated 1, 55kDa                            | XM_002189094       | +3.1        | MPP1                                                          | cGMP signaling                                                                                          |
|                                  | similar to Phosphatidylinositol 4-kinase, catalytic, alpha          | XM_002195771       | +2.9        | PI4KA                                                         | PtdIns(4)P/PtdIns(4,5)P2 synthesis: membrane trafficking, PKC activation, calcium signaling             |
|                                  | similar to Phosphoinositide-3-kinase, class 2, alpha polypeptide    | XM_002197749       | +2.6        | PIK3C2A                                                       |                                                                                                         |
|                                  | similar to Dual specificity phosphatase 5                           | XM_002197720       | +2.3        | DUSP5                                                         | MAPK pathway                                                                                            |
|                                  | Sperm associated antigen 9                                          | XM_002198144       |             | SPAG9                                                         | MAPK pathway                                                                                            |
|                                  | similar to GDNF family receptor alpha 1                             | XR_053899          | +2.2        | GFRA1                                                         | GDNF-receptor: neuron differentiation, synaptogenesis                                                   |
|                                  | similar to Alpha keratin 1                                          | XM_002194173       |             | KRT1                                                          | ECM-signaling: cell migration                                                                           |
|                                  | Mitogen-activated protein kinase 6                                  | XM_002198097       |             | MAPK6                                                         | MAPK pathway                                                                                            |
|                                  | similar to Mitogen-activated protein kinase 13                      | XM_002198912       |             | MAPK13                                                        | MAPK pathway                                                                                            |
|                                  | similar to ATPase, Ca++ transporting, ubiquitous                    | XR_054375          | +2.1        | ATP2A3                                                        | Calcium sequestration into ER                                                                           |
|                                  | Ectodysplasin A2 receptor                                           | XM_002189351       |             | EDA2R                                                         | EDA-receptor: pro-apoptotic                                                                             |
|                                  | Kinase insert domain receptor (a type III receptor tyrosine kinase) | XM_002195714       |             | KDR                                                           | VEGF receptor: angiogenesis                                                                             |
|                                  | similar to Docking protein 7                                        | XM_002195142       | +2.0        | DOK7                                                          | Tyrosine kinase signaling                                                                               |
|                                  | similar to leucine-rich repeat kinase 1                             | XM_002197914       |             | LRRK1                                                         | MAPK pathway                                                                                            |
|                                  | similar to Phosphodiesterase 4D, cAMP-specific                      | XM_002187817       |             | PDE4D                                                         | cAMP signaling                                                                                          |
|                                  | similar to Phosphodiesterase 5A, cGMP-specific                      | XM_002198904       |             | PDE5A                                                         | cGMP signaling                                                                                          |
|                                  | similar to thyrotropin-releasing hormone receptor 3                 | XM_002190995       |             | TRHR                                                          | TRH-receptor: neuromodulation                                                                           |
|                                  | similar to Serine incorporator 4                                    | XM_002187749       | -2.0        | SERINC4                                                       | Lipogenesis: phosphatidylserine (PKC activation), sphingolipids (metabolite signaling)                  |
| Leucine rich repeat containing 7 | ENSTGUT00000010780                                                  | -2.6               | LRRC7       | Activity-dependent calcium signaling                          |                                                                                                         |
| Cellular homeostasis             | LMBR1 domain containing 1                                           | XM_002191722       | +3.1        | LMBRD1                                                        | Cobalamin coenzyme synthesis: cytokine homeostasis                                                      |
|                                  | Corticotropin releasing hormone binding protein                     | XM_002190644       | +2.9        | CRHBP                                                         | Energy homeostasis                                                                                      |
|                                  | similar to Hect domain and RLD 2                                    | XM_001109970       | +2.7        | HERC2                                                         | Regulator of ubiquitylation signaling: e.g. DNA damage repair                                           |
|                                  | ATPase, H+ transporting, lysosomal 42kDa, V1 subunit C1             | XM_002198994       | +2.3        | ATP6V1C1                                                      | Regulation of cytosolic pH                                                                              |
|                                  | similar to DnaJ (Hsp40) homolog, subfamily B, member 5              | XM_002189924       |             | DNAJB5                                                        | Molecular chaperone                                                                                     |
|                                  | Deiodinase, iodothyronine, type II                                  | ENSTGUT00000012872 | +2.2        | DIO2                                                          | Local thyroid hormone homeostasis                                                                       |
|                                  | Urotensin 2 domain containing                                       | XM_002190533       |             | UTS2D                                                         | Hypotension                                                                                             |
|                                  | Bombesin-like receptor 3                                            | XM_002189155       | +2.1        | BRS3                                                          | Energy homeostasis: increased metabolic rate                                                            |
|                                  | similar to Fanconi anemia, complementation group A                  | XM_002195957       |             | FANCA                                                         | Inhibition of SPTAN1-protein cleavage: DNA damage repair                                                |
|                                  | Coagulation factor XIII, A1 polypeptide                             | XM_002199749       | +2.0        | F13A1                                                         | Transglutaminase: crosslinking to fibrin in the ECM                                                     |
|                                  | Neuropeptide Y                                                      | XM_002193012       |             | NPY                                                           | Energy homeostasis; Modulation of neurotransmitter release and sensitivity; Angiogenesis; Neurogenesis; |
|                                  | similar to solute carrier family 6, member 17                       | ENSTGUG00000000875 |             | SLC6A17                                                       | Glutamate and GABA re-uptake                                                                            |
|                                  | Solute carrier family 40 (iron-regulated transporter), member 1     | XM_002191905       |             | SLC40A1                                                       | Iron export                                                                                             |
| Melanocortin 4 receptor          | XM_002199220                                                        | -2.0               | MC4R        | Leptin-dependent energy homeostasis: increased metabolic rate |                                                                                                         |
| Cell-Cell/ECM interaction        | Collagen, type VI, alpha 1                                          | XM_002190829       | +2.6        | COL6A1                                                        | ECM: neuron survival                                                                                    |
|                                  | odz, odd Oz/ten-m homolog 1(Drosophila)                             | XM_002197079       | +2.5        | ODZ1                                                          | Formation of neuronal connections                                                                       |

|                                           |                                                                  |                    |      |                     |                                                                                                                          |
|-------------------------------------------|------------------------------------------------------------------|--------------------|------|---------------------|--------------------------------------------------------------------------------------------------------------------------|
|                                           | similar to WAP four-disulfide core domain 1                      | XM_002194482       | +2.1 | WFDC1               | ECM-modulation: pro-angiogenic                                                                                           |
|                                           | Collagen, type IV, alpha 1                                       | XM_002190412       | +2.0 | COL4A1              | Basement membrane: brain development                                                                                     |
|                                           | similar to Dermatopontin                                         | XM_002193636       |      | DPT                 | ECM: collagen fibrillogenesis, cell anchoring                                                                            |
|                                           | Endomucin                                                        | ENSTGUT00000003661 |      | EMCN                | Endothelial cells: anti-adhesive                                                                                         |
|                                           | Multimerin-2 Precursor                                           | ENSTGUT00000005954 | -2.0 | MMRN2               | Vascular endothelial cell surface                                                                                        |
|                                           | similar to Otogelin-like protein C12orf64                        | XM_002191580       |      | OTOGL               | ECM                                                                                                                      |
| FAT tumor suppressor homolog 3            | XM_002200159                                                     | -2.2               | FAT3 | Neurite interaction |                                                                                                                          |
| Cellular metabolism                       | Fatty acid desaturase 2                                          | XM_002194908       | +3.1 | FADS2               | Long-chain polyunsaturated membrane phospholipid synthesis                                                               |
|                                           | Kinectin 1                                                       | XM_002200392       | +2.5 | KTN1                | Endoplasmic reticulum mobility; Membrane protein synthesis                                                               |
|                                           | Aldehyde dehydrogenase 1 family, member A2                       | NM_001076685       | +2.2 | ALDH1A2             | Retinoic acid synthesis: bird song maturation                                                                            |
|                                           | Acyl-CoA synthetase bubblegum family member 2                    | ENSTGUT00000000379 | +2.0 | ACSBG2              | Fatty acid metabolism                                                                                                    |
|                                           | similar to GalNAc-4-sulfotransferase 2                           | XM_002200243       |      | CHST9               | Sulfation of glycoproteins                                                                                               |
|                                           | TBC1 domain family, member 9 (with GRAM domain)                  | XM_002192083       | -2.1 | TBC1D9              | Rab-GAB: inactivation of a specific membrane trafficking event                                                           |
|                                           | Ecto-NOX disulfide-thiol exchanger 1                             | XM_002196081       | -2.2 | ENOX1               | Mitosis: cell enlargement                                                                                                |
| Growth factors                            | Tumor necrosis factor ligand superfamily member 13B              | ENSTGUT00000011241 | +2.9 | TNFSF13B            | Development of humoral immune response; Inhibition of neurite outgrowth                                                  |
|                                           | similar to wingless-type MMTV integration site family, member 7B | XM_002187951       | +2.4 | WNT7B               | Angiogenesis; Dendritic arborization                                                                                     |
|                                           | Brain-derived neurotrophic factor                                | NM_001048255       | +2.2 | BDNF                | Bird song maturation (see text)                                                                                          |
|                                           | similar to Placental growth factor                               | XM_002199929       |      | PGF                 | Angiogenesis; Neuron survival                                                                                            |
|                                           | Calcium-dependent secretion activator 2                          | ENSTGUT00000004647 | +2.0 | CADPS2              | BDNF release                                                                                                             |
|                                           | Insulin-like growth factor 2                                     | XM_002186502       |      | IGF2                | Bird song nuclei development                                                                                             |
|                                           | Met proto-oncogene                                               | XM_002193399       |      | MET                 | HGF-receptor: pro-angiogenic                                                                                             |
| Ion channels and neurotransmitter release | similar to Synaptic vesicle glycoprotein 2b                      | XM_002197697       | +2.3 | SV2B                | Neurotransmitter release                                                                                                 |
|                                           | Ovoinhibitor                                                     | XM_002194425       | +2.1 | SPINK5              | Inhibition of BK channels: feedback on VGCC opening                                                                      |
|                                           | similar to Ras like G protein Rad                                | ENSTGUT00000010101 | +2.0 | RRAD                | Regulator of VGCC activity: Neurotransmitter release                                                                     |
|                                           | similar to Dmx-like 2                                            | XM_002196449       | -2.0 | DMXL2               | Rab3 GDP/GTP exchange: regulation of neurotransmitter release                                                            |
|                                           | sodium channel, voltage-gated, type II, alpha subunit            | ENSTGUT00000007427 |      | SCN2A               | Excitability                                                                                                             |
|                                           | Peroxisomal biogenesis factor 5-like                             | XM_002193042       | -2.2 | PEX5L               | Regulation of surface expression and inhibition of HCN1 channels: excitability, rhythmic activity, dendritic integration |
| Cytoskeleton                              | similar to Actinin, alpha 2                                      | XM_002195531       | +2.4 | ACTN2               | Membrane protein localization                                                                                            |
|                                           | similar to Myosin X                                              | XM_002193143       |      | MYO10               | Cytoskeletal dynamics                                                                                                    |
|                                           | Spectrin, alpha, non-erythrocytic 1 (alpha-fodrin)               | XM_002197783       | +2.2 | SPTAN1              | Cytoskeleton organization; Mitosis and DNA repair                                                                        |
|                                           | Transmembrane protein 201                                        | XM_002187261       |      | TMEM201             | Mitosis                                                                                                                  |
|                                           | Neurofilament medium polypeptide                                 | XM_002197502       | +2.1 | NEFM                | Neuronal development                                                                                                     |
|                                           | Microtubule-actin crosslinking factor 1                          | ENSTGUT00000001370 | +2.0 | MACF1               | Cytoskeletal dynamics: cell migration                                                                                    |
| Transcription regulation                  | Single stranded DNA binding protein 3                            | XR_054511          | +2.4 | SSBP3               | Neuron development                                                                                                       |
|                                           | Androgen receptor                                                | NM_001076688       | +2.0 | AR                  | Bird song maturation                                                                                                     |
|                                           | similar to Snail homolog 2 (Drosophila)                          | XM_002197191       |      | SNAI2               | Gene repression: pro cell migration                                                                                      |
|                                           | similar to Mesoderm induction early response 1, family member 2  | XM_002193165       | -2.0 | MIER2               | Gene repression (ESR1-corepressor)                                                                                       |
|                                           | Sex comb on midleg-like 2 (Drosophila)                           | XM_002196976       |      | SCML2               | PcG1 subunits: neural stem cell proliferation, repression of neurogenic genes and neurogenic to astrogenic fate switch   |
|                                           | similar to Ring finger protein 2                                 | XM_002190830       | -2.8 | RNF2                |                                                                                                                          |
