# Supplementary material for: Regulatory mechanisms of testosterone-stimulated song in the sensorimotor nucleus HVC of female songbirds
Source: PubMed Central journal article supplement (PMC4261767; doi:10.1186/s12868-014-0128-0), 2014-12-02
Supplement: 12868_2014_128_MOESM5_ESM.pdf [file 12868_2014_128_MOESM5_ESM.pdf]

A

Up-regulated

Down-regulated

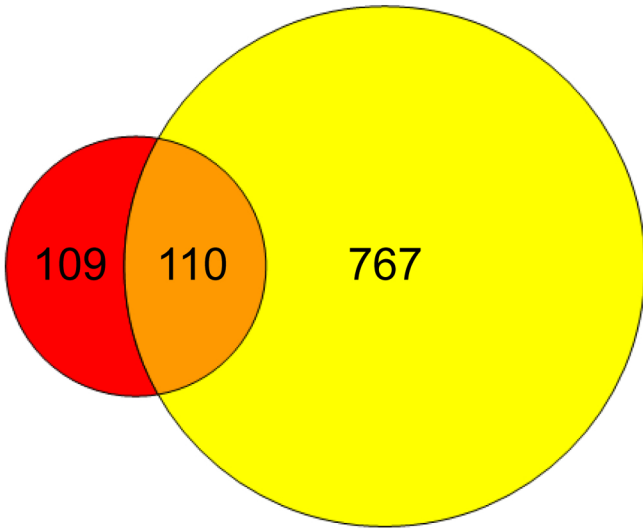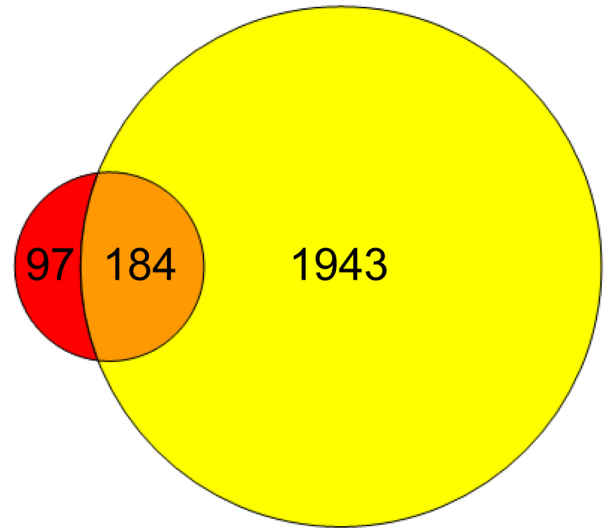

B

Female Robin

Female Canary

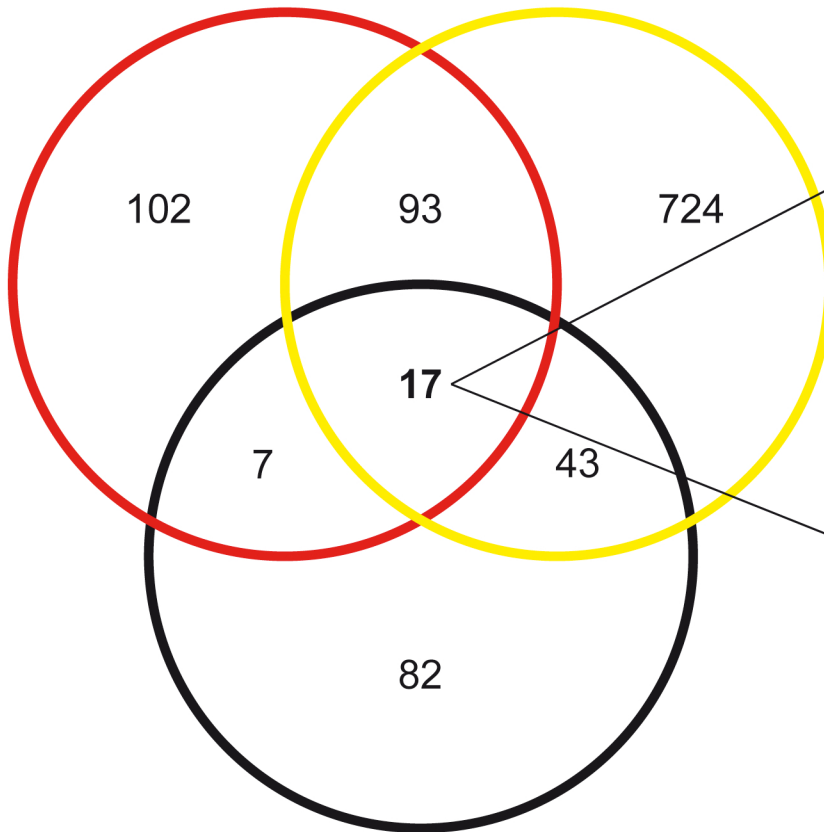

**BDNF**  
CCDC109A  
CHGB  
CRHBP  
DIO2  
DUSP5  
FABP7  
FDFT1  
**HOMER1**  
IDI1  
LRRK1  
NEFM  
NPY  
PI4KA  
**SV2B**  
TMEM201  
UTS2D

Male White-Crowned Sparrow
