# Supplementary material for: Regulatory mechanisms of testosterone-stimulated song in the sensorimotor nucleus HVC of female songbirds
Source: PubMed Central journal article supplement (PMC4261767; doi:10.1186/s12868-014-0128-0), 2014-12-02
Supplement: 12868_2014_128_MOESM6_ESM.pdf [file 12868_2014_128_MOESM6_ESM.pdf]

A

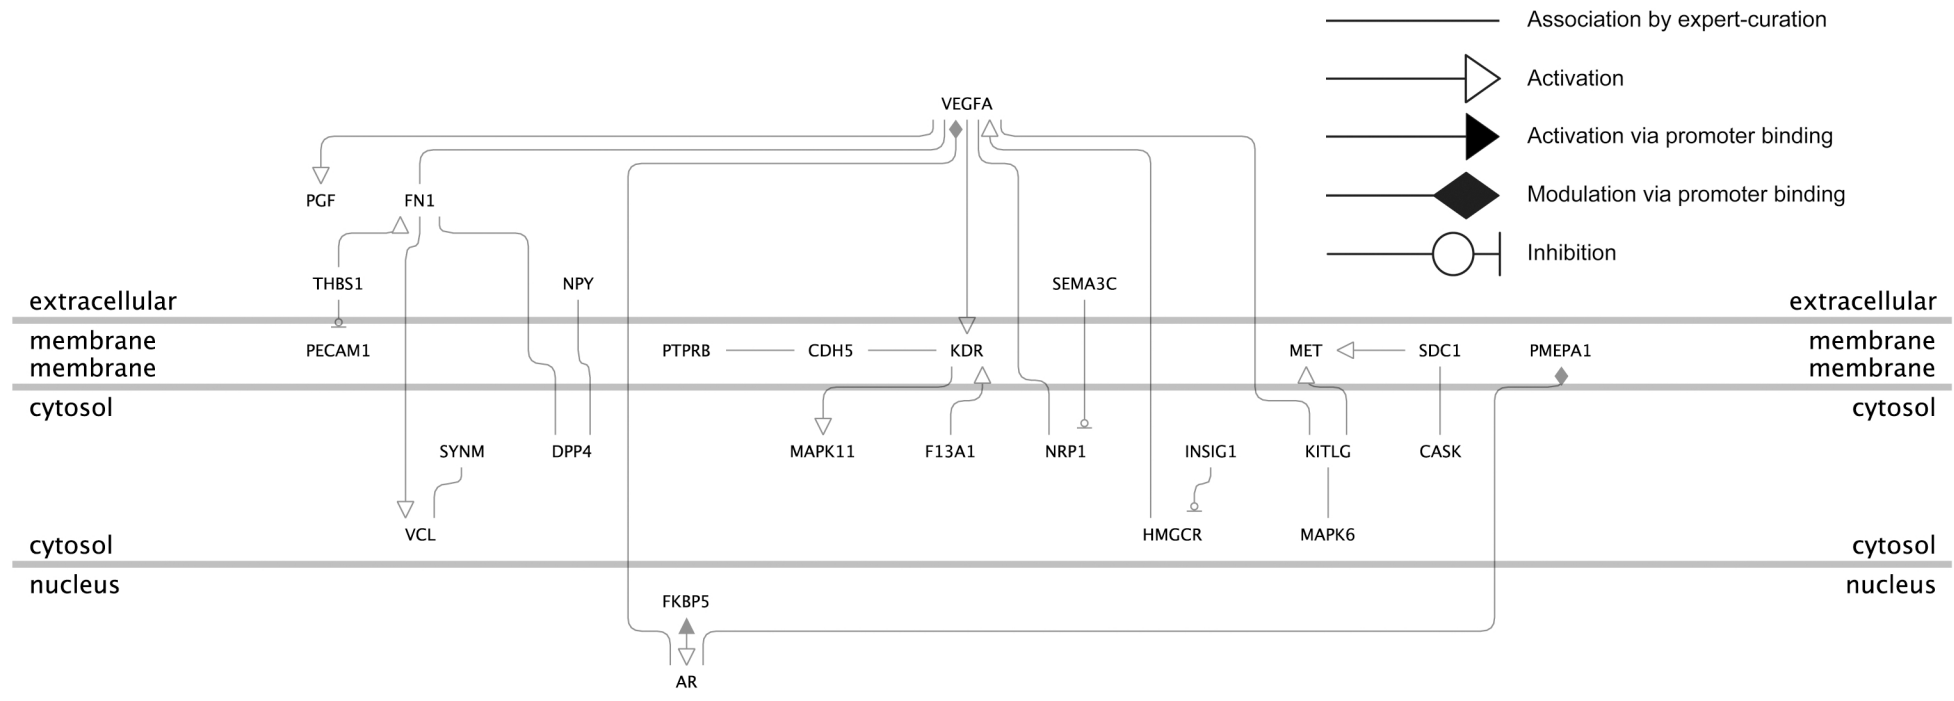

B

| Symbol | Gene name                                                                              | Reference |
|--------|----------------------------------------------------------------------------------------|-----------|
| AR     | androgen receptor                                                                      |           |
| CASK   | calcium/calmodulin-dependent serine protein kinase                                     |           |
| CDH5   | cadherin 5, type 2                                                                     | 2         |
| DPP4   | dipeptidyl-peptidase 4                                                                 | 5         |
| F13A1  | coagulation factor XIII, A1 polypeptide                                                |           |
| FKBP5  | FK506 binding protein 5                                                                |           |
| FN1    | fibronectin 1                                                                          | 12        |
| HMGCR  | 3-hydroxy-3-methylglutaryl-CoA reductase                                               | 3         |
| INSIG1 | insulin induced gene 1                                                                 |           |
| KDR    | kinase insert domain receptor                                                          | 10        |
| KITLG  | KIT ligand                                                                             | 11        |
| MAPK6  | mitogen-activated protein kinase 6                                                     |           |
| MAPK11 | mitogen-activated protein kinase 11                                                    |           |
| MET    | met proto-oncogene                                                                     | 1         |
| NPY    | neuropeptide Y                                                                         | 4         |
| NRP1   | neuropilin 1                                                                           | 10        |
| PECAM1 | platelet/endothelial cell adhesion molecule 1                                          | 9         |
| PGF    | placental growth factor                                                                | 10        |
| PMEPA1 | prostate transmembrane protein, androgen induced 1                                     |           |
| PTPRB  | protein tyrosine phosphatase, receptor type, B                                         | 6         |
| SDC1   | syndecan 1                                                                             | 7         |
| SEMA3C | sema domain, immunoglobulin domain (Ig), short basic domain, secreted, (semaphorin) 3C | 8         |
| SYNM   | synemin, intermediate filament protein                                                 |           |
| THBS1  | thrombospondin 1                                                                       | 9         |
| VEGFA  | vascular endothelial growth factor A                                                   | 10        |
| VCL    | vinculin                                                                               |           |

References:

<sup>1</sup>Abounader R, Laterra J: Scatter factor/hepatocyte growth factor in brain tumor growth and angiogenesis. *Neuro Oncol* 2005, 7:436-451.

<sup>2</sup>Carmeliet P, Lampugnani MG, Moons L, Breviaro F, Compernelle V, Bono F, Balconi G, Spagnuolo R, Oosthuysen B, Dewerchin M, Zanetti A, Angellilo A, Mattot V, Nuyens D, Lutgens E, Clotman F, de Ruiter MC, Gittenberger-de Groot A, Poelmann R, Lupu F, Herbert JM, Collen D, Dejana E: Targeted deficiency or cytosolic truncation of the VE-cadherin gene in mice impairs VEGF-mediated endothelial survival and angiogenesis. *Cell* 1999, 98:147-157.

<sup>3</sup>Eisa-Beygi S, Hatch G, Noble S, Ekker M, Moon TW: The 3-hydroxy-3-methylglutaryl-CoA reductase (HMGCR) pathway regulates developmental cerebral-vascular stability via prenylation-dependent signalling pathway. *Dev Biol* 2013, 373:258-266.

<sup>4</sup>Ekstrand AJ, Cao R, Bjorndahl M, Nystrom S, Jonsson-Rylander AC, Hassani H, Hallberg B, Nordlander M, Cao Y: Deletion of neuropeptide Y (NPY) 2 receptor in mice results in blockage of NPY-induced angiogenesis and delayed wound healing. *Proc Natl Acad Sci U S A* 2003, 100:6033-6038.

<sup>5</sup>Kittlinska J, Lee EW, Li L, Pons J, Estes L, Zukowska Z: Dual role of dipeptidyl peptidase IV (DPP IV) in angiogenesis and vascular remodeling. *Adv Exp Med Biol* 2003, 524:215-222.

<sup>6</sup>Mori M, Murata Y, Kotani T, Kusakari S, Ohnishi H, Saito Y, Okazawa H, Ishizuka T, Mori M, Matozaki T: Promotion of cell spreading and migration by vascular endothelial-protein tyrosine phosphatase (VE-PTP) in cooperation with integrins. *J Cell Physiol* 2010, 224:195-204.

<sup>7</sup>Rapraeger AC, Ell BJ, Roy M, Li X, Morrison OR, Thomas GM, Beauvais DM: Vascular endothelial-cadherin stimulates syndecan-1-coupled insulin-like growth factor-1 receptor and cross-talk between  $\alpha$ V $\beta$ 3 integrin and vascular endothelial growth factor receptor 2 at the onset of endothelial cell dissemination during angiogenesis. *FEBS J* 2013, 280:2194-2206.

<sup>8</sup>Salikhova A, Wang L, Lanahan AA, Liu M, Simons M, Leenders WP, Mukhopadhyay D, Horowitz A: Vascular endothelial growth factor and semaphorin induce neuropilin-1 endocytosis via separate pathways. *Circ Res* 2008, 103:e71-79.

<sup>9</sup>Sheibani N, Frazier WA: Thrombospondin-1, PECAM-1, and regulation of angiogenesis. *Histol Histopathol* 1999, 14:285-294.

<sup>10</sup>Shibuya M: Vascular endothelial growth factor and its receptor system: physiological functions in angiogenesis and pathological roles in various diseases. *J Biochem* 2013, 153:13-19.

<sup>11</sup>Sun L, Hui AM, Su Q, Vortmeyer A, Kotliarov Y, Pastorino S, Passaniti A, Menon J, Walling J, Bailey R, Rosenblum M, Mikkelsen T, Fine HA: Neuronal and glioma-derived stem cell factor induces angiogenesis within the brain. *Cancer Cell* 2006, 9:287-300.

<sup>12</sup>Wang J, Milner R: Fibronectin promotes brain capillary endothelial cell survival and proliferation through  $\alpha$ 5 $\beta$ 1 and  $\alpha$ v $\beta$ 3 integrins via MAP kinase signalling. *J Neurochem* 2006, 96:148-159.
