# Supplementary material for: Regulatory mechanisms of testosterone-stimulated song in the sensorimotor nucleus HVC of female songbirds
Source: PubMed Central journal article supplement (PMC4261767; doi:10.1186/s12868-014-0128-0), 2014-12-02
Supplement: 12868_2014_128_MOESM7_ESM.pdf [file 12868_2014_128_MOESM7_ESM.pdf]

## A

| <b>Accession</b> | <b>GO Term Biological Process enriched in up regulated genes</b> | <b>Robin</b> |
|------------------|------------------------------------------------------------------|--------------|
| GO:0001568       | blood vessel development                                         | 8.58E-10     |
| GO:0001944       | vasculature development                                          | 2.41E-09     |
| GO:0040011       | locomotion                                                       | 4.53E-08     |
| GO:0048856       | anatomical structure development                                 | 2.08E-07     |
| GO:0072358       | cardiovascular system development                                | 3.26E-07     |
| GO:0072359       | circulatory system development                                   | 3.26E-07     |
| GO:0009605       | response to external stimulus                                    | 9.15E-07     |
| GO:0050896       | response to stimulus                                             | 9.18E-07     |
| GO:0042221       | response to chemical stimulus                                    | 1.21E-06     |
| GO:0006695       | cholesterol biosynthetic process                                 | 1.28E-06     |
| GO:0006935       | chemotaxis                                                       | 1.47E-06     |
| GO:0042330       | taxis                                                            | 1.47E-06     |
| GO:0032502       | developmental process                                            | 2.00E-06     |
| GO:0048646       | anatomical structure formation involved in morphogenesis         | 2.07E-06     |
| GO:0007411       | axon guidance                                                    | 2.74E-06     |
| GO:0007275       | multicellular organismal development                             | 3.09E-06     |
| GO:0016126       | sterol biosynthetic process                                      | 3.19E-06     |
| GO:0048731       | system development                                               | 3.22E-06     |
| GO:0032501       | multicellular organismal process                                 | 3.41E-06     |
| GO:0008299       | isoprenoid biosynthetic process                                  | 8.02E-06     |
| GO:0007155       | cell adhesion                                                    | 8.44E-06     |
| GO:0022610       | biological adhesion                                              | 8.44E-06     |
| GO:0045636       | positive regulation of melanocyte differentiation                | 8.72E-06     |
| GO:0050942       | positive regulation of pigment cell differentiation              | 8.72E-06     |
| GO:0072089       | stem cell proliferation                                          | 8.74E-06     |
| GO:0048583       | regulation of response to stimulus                               | 9.92E-06     |
| GO:0009653       | anatomical structure morphogenesis                               | 1.04E-05     |
| GO:0002576       | platelet degranulation                                           | 1.16E-05     |
| GO:0006694       | steroid biosynthetic process                                     | 1.36E-05     |
| GO:0030154       | cell differentiation                                             | 1.42E-05     |
| GO:0048514       | blood vessel morphogenesis                                       | 1.70E-05     |

|            |                                                       |          |
|------------|-------------------------------------------------------|----------|
| GO:0032101 | regulation of response to external stimulus           | 1.93E-05 |
| GO:0048087 | positive regulation of developmental pigmentation     | 2.17E-05 |
| GO:0007409 | axonogenesis                                          | 2.67E-05 |
| GO:0001525 | angiogenesis                                          | 2.98E-05 |
| GO:0000904 | cell morphogenesis involved in differentiation        | 3.24E-05 |
| GO:0006720 | isoprenoid metabolic process                          | 3.53E-05 |
| GO:0023052 | signaling                                             | 3.59E-05 |
| GO:0048869 | cellular developmental process                        | 3.87E-05 |
| GO:0045634 | regulation of melanocyte differentiation              | 4.29E-05 |
| GO:0050932 | regulation of pigment cell differentiation            | 4.29E-05 |
| GO:0043405 | regulation of MAP kinase activity                     | 4.31E-05 |
| GO:0035295 | tube development                                      | 4.76E-05 |
| GO:0060429 | epithelium development                                | 4.83E-05 |
| GO:0009888 | tissue development                                    | 5.51E-05 |
| GO:0048468 | cell development                                      | 6.71E-05 |
| GO:0008283 | cell proliferation                                    | 7.14E-05 |
| GO:0048667 | cell morphogenesis involved in neuron differentiation | 8.01E-05 |
| GO:0008610 | lipid biosynthetic process                            | 8.78E-05 |
| GO:0048812 | neuron projection morphogenesis                       | 9.05E-05 |
| GO:0007154 | cell communication                                    | 9.07E-05 |
| GO:0031175 | neuron projection development                         | 9.17E-05 |
| GO:0030324 | lung development                                      | 9.38E-05 |
| GO:0016477 | cell migration                                        | 9.61E-05 |
| GO:0045137 | development of primary sexual characteristics         | 9.76E-05 |
| GO:0023051 | regulation of signaling                               | 1.08E-04 |
| GO:0030323 | respiratory tube development                          | 1.10E-04 |
| GO:0051592 | response to calcium ion                               | 1.14E-04 |
| GO:0009790 | embryo development                                    | 1.28E-04 |
| GO:0042127 | regulation of cell proliferation                      | 1.29E-04 |
| GO:0006887 | exocytosis                                            | 1.47E-04 |
| GO:0030168 | platelet activation                                   | 1.48E-04 |
| GO:0060449 | bud elongation involved in lung branching             | 1.70E-04 |
| GO:0008406 | gonad development                                     | 1.94E-04 |
| GO:0048666 | neuron development                                    | 2.09E-04 |

|            |                                                        |          |
|------------|--------------------------------------------------------|----------|
| GO:0031589 | cell-substrate adhesion                                | 2.11E-04 |
| GO:0032990 | cell part morphogenesis                                | 2.29E-04 |
| GO:0051716 | cellular response to stimulus                          | 2.31E-04 |
| GO:0003158 | endothelium development                                | 2.34E-04 |
| GO:0030855 | epithelial cell differentiation                        | 2.57E-04 |
| GO:0000165 | MAPK cascade                                           | 2.61E-04 |
| GO:0007165 | signal transduction                                    | 2.64E-04 |
| GO:0032989 | cellular component morphogenesis                       | 2.67E-04 |
| GO:0009611 | response to wounding                                   | 2.69E-04 |
| GO:0010038 | response to metal ion                                  | 2.72E-04 |
| GO:0032103 | positive regulation of response to external stimulus   | 2.79E-04 |
| GO:0048870 | cell motility                                          | 2.86E-04 |
| GO:0051674 | localization of cell                                   | 2.86E-04 |
| GO:0007548 | sex differentiation                                    | 2.93E-04 |
| GO:0060541 | respiratory system development                         | 2.96E-04 |
| GO:0007243 | intracellular protein kinase cascade                   | 2.99E-04 |
| GO:0001936 | regulation of endothelial cell proliferation           | 3.04E-04 |
| GO:0000902 | cell morphogenesis                                     | 3.05E-04 |
| GO:0048608 | reproductive structure development                     | 3.14E-04 |
| GO:0030155 | regulation of cell adhesion                            | 3.26E-04 |
| GO:0030198 | extracellular matrix organization                      | 3.27E-04 |
| GO:0043062 | extracellular structure organization                   | 3.27E-04 |
| GO:0050793 | regulation of developmental process                    | 3.31E-04 |
| GO:0007160 | cell-matrix adhesion                                   | 4.21E-04 |
| GO:0006928 | cellular component movement                            | 4.25E-04 |
| GO:0030334 | regulation of cell migration                           | 4.37E-04 |
| GO:0043408 | regulation of MAPK cascade                             | 4.45E-04 |
| GO:0048070 | regulation of developmental pigmentation               | 4.45E-04 |
| GO:0071900 | regulation of protein serine-threonine kinase activity | 4.63E-04 |
| GO:0010627 | regulation of intracellular protein kinase cascade     | 4.70E-04 |
| GO:0045765 | regulation of angiogenesis                             | 4.87E-04 |
| GO:0048858 | cell projection morphogenesis                          | 5.19E-04 |
| GO:0009966 | regulation of signal transduction                      | 5.32E-04 |
| GO:0008203 | cholesterol metabolic process                          | 5.40E-04 |

|            |                                                                  |          |
|------------|------------------------------------------------------------------|----------|
| GO:0050673 | epithelial cell proliferation                                    | 5.42E-04 |
| GO:0071363 | cellular response to growth factor stimulus                      | 5.43E-04 |
| GO:0042981 | regulation of apoptotic process                                  | 5.55E-04 |
| GO:0035556 | intracellular signal transduction                                | 5.62E-04 |
| GO:0030030 | cell projection organization                                     | 5.69E-04 |
| GO:0046546 | development of primary male sexual characteristics               | 5.71E-04 |
| GO:0014032 | neural crest cell development                                    | 5.76E-04 |
| GO:0034330 | cell junction organization                                       | 6.11E-04 |
| GO:0043067 | regulation of programmed cell death                              | 6.28E-04 |
| GO:0003006 | developmental process involved in reproduction                   | 6.29E-04 |
| GO:0030182 | neuron differentiation                                           | 6.41E-04 |
| GO:0010035 | response to inorganic substance                                  | 6.44E-04 |
| GO:0048754 | branching morphogenesis of a tube                                | 6.44E-04 |
| GO:0001763 | morphogenesis of a branching structure                           | 6.61E-04 |
| GO:0050678 | regulation of epithelial cell proliferation                      | 6.88E-04 |
| GO:0001935 | endothelial cell proliferation                                   | 7.14E-04 |
| GO:2000145 | regulation of cell motility                                      | 7.17E-04 |
| GO:0051234 | establishment of localization                                    | 7.63E-04 |
| GO:0016125 | sterol metabolic process                                         | 7.86E-04 |
| GO:0009719 | response to endogenous stimulus                                  | 8.26E-04 |
| GO:0046661 | male sex differentiation                                         | 8.28E-04 |
| GO:0006810 | transport                                                        | 8.52E-04 |
| GO:0022008 | neurogenesis                                                     | 8.78E-04 |
| GO:0042692 | muscle cell differentiation                                      | 8.81E-04 |
| GO:0010941 | regulation of cell death                                         | 9.38E-04 |
| GO:0048519 | negative regulation of biological process                        | 9.41E-04 |
| GO:0007169 | transmembrane receptor protein tyrosine kinase signaling pathway | 9.50E-04 |
| GO:0010810 | regulation of cell-substrate adhesion                            | 9.76E-04 |
| GO:0070848 | response to growth factor stimulus                               | 9.82E-04 |
| GO:0060572 | morphogenesis of an epithelial bud                               | 1.09E-03 |
| GO:0048584 | positive regulation of response to stimulus                      | 1.10E-03 |
| GO:0014033 | neural crest cell differentiation                                | 1.11E-03 |
| GO:0050795 | regulation of behavior                                           | 1.11E-03 |
| GO:0065007 | biological regulation                                            | 1.16E-03 |

|            |                                                                                |          |
|------------|--------------------------------------------------------------------------------|----------|
| GO:0022603 | regulation of anatomical structure morphogenesis                               | 1.18E-03 |
| GO:0051179 | localization                                                                   | 1.21E-03 |
| GO:0050920 | regulation of chemotaxis                                                       | 1.23E-03 |
| GO:0051270 | regulation of cellular component movement                                      | 1.28E-03 |
| GO:0065008 | regulation of biological quality                                               | 1.28E-03 |
| GO:0035924 | cellular response to vascular endothelial growth factor stimulus               | 1.31E-03 |
| GO:0034329 | cell junction assembly                                                         | 1.32E-03 |
| GO:0071902 | positive regulation of protein serine-threonine kinase activity                | 1.33E-03 |
| GO:0048041 | focal adhesion assembly                                                        | 1.34E-03 |
| GO:0043066 | negative regulation of apoptotic process                                       | 1.38E-03 |
| GO:0043406 | positive regulation of MAP kinase activity                                     | 1.38E-03 |
| GO:0043542 | endothelial cell migration                                                     | 1.46E-03 |
| GO:0040012 | regulation of locomotion                                                       | 1.48E-03 |
| GO:0045446 | endothelial cell differentiation                                               | 1.48E-03 |
| GO:0043069 | negative regulation of programmed cell death                                   | 1.51E-03 |
| GO:0008584 | male gonad development                                                         | 1.54E-03 |
| GO:0001885 | endothelial cell development                                                   | 1.56E-03 |
| GO:0034220 | ion transmembrane transport                                                    | 1.56E-03 |
| GO:0010595 | positive regulation of endothelial cell migration                              | 1.64E-03 |
| GO:0032940 | secretion by cell                                                              | 1.64E-03 |
| GO:0010839 | negative regulation of keratinocyte proliferation                              | 1.66E-03 |
| GO:0048012 | hepatocyte growth factor receptor signaling pathway                            | 1.66E-03 |
| GO:0060666 | dichotomous subdivision of terminal units involved in salivary gland branching | 1.66E-03 |
| GO:0006629 | lipid metabolic process                                                        | 1.76E-03 |
| GO:0007267 | cell-cell signaling                                                            | 1.81E-03 |
| GO:0048699 | generation of neurons                                                          | 1.90E-03 |
| GO:0051094 | positive regulation of developmental process                                   | 1.91E-03 |
| GO:0010033 | response to organic substance                                                  | 2.02E-03 |
| GO:0035162 | embryonic hemopoiesis                                                          | 2.14E-03 |
| GO:0040036 | regulation of fibroblast growth factor receptor signaling pathway              | 2.14E-03 |
| GO:0051893 | regulation of focal adhesion assembly                                          | 2.14E-03 |
| GO:0060445 | branching involved in salivary gland morphogenesis                             | 2.14E-03 |
| GO:0090109 | regulation of cell-substrate junction assembly                                 | 2.14E-03 |
| GO:0044255 | cellular lipid metabolic process                                               | 2.22E-03 |

|            |                                                                          |          |
|------------|--------------------------------------------------------------------------|----------|
| GO:0060548 | negative regulation of cell death                                        | 2.24E-03 |
| GO:0061061 | muscle structure development                                             | 2.27E-03 |
| GO:0048010 | vascular endothelial growth factor receptor signaling pathway            | 2.36E-03 |
| GO:0048513 | organ development                                                        | 2.41E-03 |
| GO:0010463 | mesenchymal cell proliferation                                           | 2.57E-03 |
| GO:0007399 | nervous system development                                               | 2.70E-03 |
| GO:0046903 | secretion                                                                | 2.76E-03 |
| GO:0060485 | mesenchyme development                                                   | 2.76E-03 |
| GO:0010811 | positive regulation of cell-substrate adhesion                           | 2.79E-03 |
| GO:0008202 | steroid metabolic process                                                | 2.83E-03 |
| GO:0045766 | positive regulation of angiogenesis                                      | 2.83E-03 |
| GO:0010646 | regulation of cell communication                                         | 2.86E-03 |
| GO:0042060 | wound healing                                                            | 2.99E-03 |
| GO:0016310 | phosphorylation                                                          | 3.01E-03 |
| GO:0010453 | regulation of cell fate commitment                                       | 3.22E-03 |
| GO:0021846 | cell proliferation in forebrain                                          | 3.22E-03 |
| GO:0050789 | regulation of biological process                                         | 3.22E-03 |
| GO:0060571 | morphogenesis of an epithelial fold                                      | 3.22E-03 |
| GO:0007215 | glutamate receptor signaling pathway                                     | 3.27E-03 |
| GO:0048523 | negative regulation of cellular process                                  | 3.28E-03 |
| GO:0006950 | response to stress                                                       | 3.38E-03 |
| GO:0038084 | vascular endothelial growth factor signaling pathway                     | 3.43E-03 |
| GO:0060592 | mammary gland formation                                                  | 3.43E-03 |
| GO:0072091 | regulation of stem cell proliferation                                    | 3.43E-03 |
| GO:2000310 | regulation of N-methyl-D-aspartate selective glutamate receptor activity | 3.43E-03 |
| GO:0000188 | inactivation of MAPK activity                                            | 3.65E-03 |
| GO:0042445 | hormone metabolic process                                                | 3.88E-03 |
| GO:0042493 | response to drug                                                         | 3.91E-03 |
| GO:0008285 | negative regulation of cell proliferation                                | 3.95E-03 |
| GO:0071495 | cellular response to endogenous stimulus                                 | 4.06E-03 |
| GO:0006468 | protein phosphorylation                                                  | 4.09E-03 |
| GO:0050794 | regulation of cellular process                                           | 4.10E-03 |
| GO:0061138 | morphogenesis of a branching epithelium                                  | 4.16E-03 |
| GO:0009791 | post-embryonic development                                               | 4.18E-03 |

|            |                                                             |          |
|------------|-------------------------------------------------------------|----------|
| GO:0035107 | appendage morphogenesis                                     | 4.20E-03 |
| GO:0035108 | limb morphogenesis                                          | 4.20E-03 |
| GO:0051403 | stress-activated MAPK cascade                               | 4.31E-03 |
| GO:0008343 | adult feeding behavior                                      | 4.53E-03 |
| GO:0035767 | endothelial cell chemotaxis                                 | 4.53E-03 |
| GO:0060484 | lung-associated mesenchyme development                      | 4.53E-03 |
| GO:0061028 | establishment of endothelial barrier                        | 4.53E-03 |
| GO:0050878 | regulation of body fluid levels                             | 4.59E-03 |
| GO:0001952 | regulation of cell-matrix adhesion                          | 4.72E-03 |
| GO:0031098 | stress-activated protein kinase signaling cascade           | 4.72E-03 |
| GO:0003007 | heart morphogenesis                                         | 4.79E-03 |
| GO:0001101 | response to acid                                            | 4.89E-03 |
| GO:0043410 | positive regulation of MAPK cascade                         | 4.96E-03 |
| GO:0007044 | cell-substrate junction assembly                            | 5.05E-03 |
| GO:0010740 | positive regulation of intracellular protein kinase cascade | 5.11E-03 |
| GO:0018108 | peptidyl-tyrosine phosphorylation                           | 5.13E-03 |
| GO:0030879 | mammary gland development                                   | 5.37E-03 |
| GO:0002688 | regulation of leukocyte chemotaxis                          | 5.40E-03 |
| GO:0070887 | cellular response to chemical stimulus                      | 5.42E-03 |
| GO:0018212 | peptidyl-tyrosine modification                              | 5.48E-03 |
| GO:0048762 | mesenchymal cell differentiation                            | 5.58E-03 |
| GO:0006200 | ATP catabolic process                                       | 5.67E-03 |
| GO:0018149 | peptide cross-linking                                       | 5.68E-03 |
| GO:0035115 | embryonic forelimb morphogenesis                            | 5.68E-03 |
| GO:0043009 | chordate embryonic development                              | 5.72E-03 |
| GO:0042574 | retinal metabolic process                                   | 5.78E-03 |
| GO:0043288 | apocarotenoid metabolic process                             | 5.78E-03 |
| GO:0060536 | cartilage morphogenesis                                     | 5.78E-03 |
| GO:0060841 | venous blood vessel development                             | 5.78E-03 |
| GO:0071392 | cellular response to estradiol stimulus                     | 5.78E-03 |
| GO:0007596 | blood coagulation                                           | 6.16E-03 |
| GO:0000910 | cytokinesis                                                 | 6.24E-03 |
| GO:0007435 | salivary gland morphogenesis                                | 6.28E-03 |
| GO:0048008 | platelet-derived growth factor receptor signaling pathway   | 6.28E-03 |

|            |                                                          |          |
|------------|----------------------------------------------------------|----------|
| GO:0060428 | lung epithelium development                              | 6.28E-03 |
| GO:0048729 | tissue morphogenesis                                     | 6.36E-03 |
| GO:0009792 | embryo development ending in birth or egg hatching       | 6.49E-03 |
| GO:0045859 | regulation of protein kinase activity                    | 6.58E-03 |
| GO:0007599 | hemostasis                                               | 6.59E-03 |
| GO:0050817 | coagulation                                              | 6.59E-03 |
| GO:0048732 | gland development                                        | 6.65E-03 |
| GO:0007610 | behavior                                                 | 6.73E-03 |
| GO:0048736 | appendage development                                    | 6.75E-03 |
| GO:0060173 | limb development                                         | 6.75E-03 |
| GO:0002009 | morphogenesis of an epithelium                           | 6.81E-03 |
| GO:0060711 | labyrinthine layer development                           | 6.91E-03 |
| GO:0060326 | cell chemotaxis                                          | 7.01E-03 |
| GO:0015936 | coenzyme A metabolic process                             | 7.16E-03 |
| GO:0060174 | limb bud formation                                       | 7.16E-03 |
| GO:0046034 | ATP metabolic process                                    | 7.27E-03 |
| GO:2000026 | regulation of multicellular organismal development       | 7.29E-03 |
| GO:0051781 | positive regulation of cell division                     | 7.39E-03 |
| GO:0001657 | ureteric bud development                                 | 7.49E-03 |
| GO:0007163 | establishment or maintenance of cell polarity            | 7.49E-03 |
| GO:0006915 | apoptotic process                                        | 7.53E-03 |
| GO:0002053 | positive regulation of mesenchymal cell proliferation    | 7.58E-03 |
| GO:0031399 | regulation of protein modification process               | 7.78E-03 |
| GO:0008360 | regulation of cell shape                                 | 7.83E-03 |
| GO:0001570 | vasculogenesis                                           | 7.84E-03 |
| GO:0043407 | negative regulation of MAP kinase activity               | 7.84E-03 |
| GO:0001701 | in utero embryonic development                           | 8.06E-03 |
| GO:0050731 | positive regulation of peptidyl-tyrosine phosphorylation | 8.18E-03 |
| GO:0006916 | anti-apoptosis                                           | 8.25E-03 |
| GO:0030318 | melanocyte differentiation                               | 8.28E-03 |
| GO:0010594 | regulation of endothelial cell migration                 | 8.31E-03 |
| GO:0012501 | programmed cell death                                    | 8.40E-03 |
| GO:0008354 | germ cell migration                                      | 8.67E-03 |
| GO:0009214 | cyclic nucleotide catabolic process                      | 8.67E-03 |



|            |                                                           |          |
|------------|-----------------------------------------------------------|----------|
| GO:0010837 | regulation of keratinocyte proliferation                  | 8.67E-03 |
| GO:0032793 | positive regulation of CREB transcription factor activity | 8.67E-03 |
| GO:0060736 | prostate gland growth                                     | 8.67E-03 |
| GO:0071622 | regulation of granulocyte chemotaxis                      | 8.67E-03 |
| GO:0080134 | regulation of response to stress                          | 8.70E-03 |
| GO:0003281 | ventricular septum development                            | 9.03E-03 |
| GO:0007431 | salivary gland development                                | 9.03E-03 |
| GO:0050931 | pigment cell differentiation                              | 9.03E-03 |
| GO:0060603 | mammary gland duct morphogenesis                          | 9.03E-03 |
| GO:0061180 | mammary gland epithelium development                      | 9.29E-03 |
| GO:0022612 | gland morphogenesis                                       | 9.68E-03 |
| GO:0046545 | development of primary female sexual characteristics      | 9.68E-03 |
| GO:0035136 | forelimb morphogenesis                                    | 9.81E-03 |
| GO:0043200 | response to amino acid stimulus                           | 9.81E-03 |
| GO:0008219 | cell death                                                | 9.96E-03 |
| GO:0045860 | positive regulation of protein kinase activity            | 9.96E-03 |

**B**

| <b>Accession</b> | <b>GO Term Biological Process enriched in up regulated genes</b> | <b>Canary</b> |
|------------------|------------------------------------------------------------------|---------------|
| GO:0023052       | signaling                                                        | 2.63E-18      |
| GO:0007154       | cell communication                                               | 9.71E-18      |
| GO:0032501       | multicellular organismal process                                 | 3.57E-15      |
| GO:0051179       | localization                                                     | 7.31E-14      |
| GO:0007275       | multicellular organismal development                             | 7.14E-13      |
| GO:0044281       | small molecule metabolic process                                 | 2.44E-12      |
| GO:0048731       | system development                                               | 4.76E-12      |
| GO:0040011       | locomotion                                                       | 1.09E-11      |

|            |                                                       |          |
|------------|-------------------------------------------------------|----------|
| GO:0006928 | cellular component movement                           | 1.82E-11 |
| GO:0007165 | signal transduction                                   | 1.93E-11 |
| GO:0032502 | developmental process                                 | 1.84E-10 |
| GO:0048856 | anatomical structure development                      | 2.02E-10 |
| GO:0048666 | neuron development                                    | 2.20E-10 |
| GO:0050896 | response to stimulus                                  | 3.36E-10 |
| GO:0048667 | cell morphogenesis involved in neuron differentiation | 4.03E-10 |
| GO:0016477 | cell migration                                        | 4.49E-10 |
| GO:0051716 | cellular response to stimulus                         | 5.24E-10 |
| GO:0048812 | neuron projection morphogenesis                       | 5.90E-10 |
| GO:0031175 | neuron projection development                         | 7.50E-10 |
| GO:0023051 | regulation of signaling                               | 7.62E-10 |
| GO:0042221 | response to chemical stimulus                         | 8.69E-10 |
| GO:0048870 | cell motility                                         | 1.18E-09 |
| GO:0051674 | localization of cell                                  | 1.18E-09 |
| GO:0048468 | cell development                                      | 1.69E-09 |
| GO:0007399 | nervous system development                            | 3.31E-09 |
| GO:0051234 | establishment of localization                         | 4.47E-09 |
| GO:0007409 | axonogenesis                                          | 5.66E-09 |
| GO:0009987 | cellular process                                      | 7.74E-09 |
| GO:0007267 | cell-cell signaling                                   | 1.08E-08 |
| GO:0000904 | cell morphogenesis involved in differentiation        | 1.20E-08 |
| GO:0035556 | intracellular signal transduction                     | 2.03E-08 |
| GO:0035637 | multicellular organismal signaling                    | 2.41E-08 |
| GO:0022008 | neurogenesis                                          | 2.65E-08 |
| GO:0030182 | neuron differentiation                                | 2.88E-08 |
| GO:0006810 | transport                                             | 2.93E-08 |
| GO:0048699 | generation of neurons                                 | 2.96E-08 |
| GO:0030154 | cell differentiation                                  | 3.71E-08 |
| GO:0040012 | regulation of locomotion                              | 3.84E-08 |
| GO:0019226 | transmission of nerve impulse                         | 4.56E-08 |
| GO:0003008 | system process                                        | 5.69E-08 |
| GO:0030030 | cell projection organization                          | 1.09E-07 |
| GO:0007268 | synaptic transmission                                 | 1.19E-07 |

|            |                                                                  |          |
|------------|------------------------------------------------------------------|----------|
| GO:0048858 | cell projection morphogenesis                                    | 1.20E-07 |
| GO:0030334 | regulation of cell migration                                     | 1.32E-07 |
| GO:0032879 | regulation of localization                                       | 1.36E-07 |
| GO:0010035 | response to inorganic substance                                  | 1.51E-07 |
| GO:0051270 | regulation of cellular component movement                        | 1.74E-07 |
| GO:0032990 | cell part morphogenesis                                          | 2.01E-07 |
| GO:2000145 | regulation of cell motility                                      | 2.07E-07 |
| GO:0048869 | cellular developmental process                                   | 2.25E-07 |
| GO:0055086 | nucleobase-containing small molecule metabolic process           | 2.74E-07 |
| GO:0046483 | heterocycle metabolic process                                    | 3.38E-07 |
| GO:0000902 | cell morphogenesis                                               | 4.78E-07 |
| GO:0032989 | cellular component morphogenesis                                 | 4.85E-07 |
| GO:0006753 | nucleoside phosphate metabolic process                           | 4.85E-07 |
| GO:0009117 | nucleotide metabolic process                                     | 4.85E-07 |
| GO:0009605 | response to external stimulus                                    | 7.48E-07 |
| GO:0009966 | regulation of signal transduction                                | 8.01E-07 |
| GO:0072521 | purine-containing compound metabolic process                     | 8.21E-07 |
| GO:0007411 | axon guidance                                                    | 8.52E-07 |
| GO:0009653 | anatomical structure morphogenesis                               | 1.00E-06 |
| GO:0001666 | response to hypoxia                                              | 1.81E-06 |
| GO:0065007 | biological regulation                                            | 1.85E-06 |
| GO:0007169 | transmembrane receptor protein tyrosine kinase signaling pathway | 2.08E-06 |
| GO:0006163 | purine nucleotide metabolic process                              | 2.23E-06 |
| GO:0050877 | neurological system process                                      | 3.99E-06 |
| GO:0007166 | cell surface receptor signaling pathway                          | 4.43E-06 |
| GO:0030155 | regulation of cell adhesion                                      | 5.00E-06 |
| GO:0007167 | enzyme linked receptor protein signaling pathway                 | 5.07E-06 |
| GO:0008283 | cell proliferation                                               | 5.54E-06 |
| GO:0050793 | regulation of developmental process                              | 6.00E-06 |
| GO:0050794 | regulation of cellular process                                   | 6.82E-06 |
| GO:0070482 | response to oxygen levels                                        | 7.27E-06 |
| GO:0000165 | MAPK cascade                                                     | 7.37E-06 |
| GO:0006732 | coenzyme metabolic process                                       | 7.94E-06 |
| GO:0010038 | response to metal ion                                            | 9.21E-06 |

|            |                                                                 |          |
|------------|-----------------------------------------------------------------|----------|
| GO:0006811 | ion transport                                                   | 1.16E-05 |
| GO:0015980 | energy derivation by oxidation of organic compounds             | 1.21E-05 |
| GO:0006935 | chemotaxis                                                      | 1.37E-05 |
| GO:0042330 | taxis                                                           | 1.37E-05 |
| GO:0009060 | aerobic respiration                                             | 1.42E-05 |
| GO:0035338 | long-chain fatty-acyl-CoA biosynthetic process                  | 1.68E-05 |
| GO:0042325 | regulation of phosphorylation                                   | 1.99E-05 |
| GO:0016043 | cellular component organization                                 | 2.04E-05 |
| GO:0071842 | cellular component organization at cellular level               | 2.05E-05 |
| GO:0010646 | regulation of cell communication                                | 2.14E-05 |
| GO:0010033 | response to organic substance                                   | 2.21E-05 |
| GO:0006084 | acetyl-CoA metabolic process                                    | 2.23E-05 |
| GO:0034329 | cell junction assembly                                          | 2.49E-05 |
| GO:0050789 | regulation of biological process                                | 2.91E-05 |
| GO:0030705 | cytoskeleton-dependent intracellular transport                  | 2.94E-05 |
| GO:0007610 | behavior                                                        | 2.97E-05 |
| GO:0007264 | small GTPase mediated signal transduction                       | 2.99E-05 |
| GO:0006099 | tricarboxylic acid cycle                                        | 3.00E-05 |
| GO:0046356 | acetyl-CoA catabolic process                                    | 3.00E-05 |
| GO:0051239 | regulation of multicellular organismal process                  | 3.22E-05 |
| GO:0046460 | neutral lipid biosynthetic process                              | 3.35E-05 |
| GO:0046463 | acylglycerol biosynthetic process                               | 3.35E-05 |
| GO:0048583 | regulation of response to stimulus                              | 3.41E-05 |
| GO:0071841 | cellular component organization or biogenesis at cellular level | 3.65E-05 |
| GO:0035336 | long-chain fatty-acyl-CoA metabolic process                     | 3.74E-05 |
| GO:0046949 | fatty-acyl-CoA biosynthetic process                             | 3.74E-05 |
| GO:0051338 | regulation of transferase activity                              | 3.75E-05 |
| GO:0031589 | cell-substrate adhesion                                         | 3.98E-05 |
| GO:0009108 | coenzyme biosynthetic process                                   | 4.26E-05 |
| GO:0071840 | cellular component organization or biogenesis                   | 4.31E-05 |
| GO:0034330 | cell junction organization                                      | 4.39E-05 |
| GO:0034220 | ion transmembrane transport                                     | 4.44E-05 |
| GO:0035384 | thioester biosynthetic process                                  | 5.36E-05 |
| GO:0071616 | acyl-CoA biosynthetic process                                   | 5.36E-05 |

|            |                                                    |          |
|------------|----------------------------------------------------|----------|
| GO:0009259 | ribonucleotide metabolic process                   | 5.63E-05 |
| GO:0065008 | regulation of biological quality                   | 5.88E-05 |
| GO:0010970 | microtubule-based transport                        | 5.97E-05 |
| GO:0001935 | endothelial cell proliferation                     | 6.12E-05 |
| GO:0043549 | regulation of kinase activity                      | 6.62E-05 |
| GO:0040013 | negative regulation of locomotion                  | 6.99E-05 |
| GO:0048522 | positive regulation of cellular process            | 7.12E-05 |
| GO:0019220 | regulation of phosphate metabolic process          | 7.15E-05 |
| GO:0051174 | regulation of phosphorus metabolic process         | 7.15E-05 |
| GO:2000026 | regulation of multicellular organismal development | 7.19E-05 |
| GO:0044283 | small molecule biosynthetic process                | 7.31E-05 |
| GO:0035337 | fatty-acyl-CoA metabolic process                   | 7.52E-05 |
| GO:0043542 | endothelial cell migration                         | 7.58E-05 |
| GO:0016310 | phosphorylation                                    | 7.94E-05 |
| GO:0051128 | regulation of cellular component organization      | 8.40E-05 |
| GO:0019432 | triglyceride biosynthetic process                  | 8.48E-05 |
| GO:0046504 | glycerol ether biosynthetic process                | 8.51E-05 |
| GO:0001932 | regulation of protein phosphorylation              | 9.34E-05 |
| GO:0009719 | response to endogenous stimulus                    | 9.42E-05 |
| GO:0006091 | generation of precursor metabolites and energy     | 9.90E-05 |
| GO:0051271 | negative regulation of cellular component movement | 1.10E-04 |
| GO:0006793 | phosphorus metabolic process                       | 1.12E-04 |
| GO:0006796 | phosphate-containing compound metabolic process    | 1.12E-04 |
| GO:0010810 | regulation of cell-substrate adhesion              | 1.19E-04 |
| GO:0008354 | germ cell migration                                | 1.21E-04 |
| GO:0009109 | coenzyme catabolic process                         | 1.21E-04 |
| GO:0055085 | transmembrane transport                            | 1.22E-04 |
| GO:0060749 | mammary gland alveolus development                 | 1.30E-04 |
| GO:0061377 | mammary gland lobule development                   | 1.30E-04 |
| GO:0001944 | vasculature development                            | 1.37E-04 |
| GO:0009150 | purine ribonucleotide metabolic process            | 1.37E-04 |
| GO:0030336 | negative regulation of cell migration              | 1.39E-04 |
| GO:0007266 | Rho protein signal transduction                    | 1.40E-04 |
| GO:0042493 | response to drug                                   | 1.42E-04 |

|            |                                                      |          |
|------------|------------------------------------------------------|----------|
| GO:0016126 | sterol biosynthetic process                          | 1.49E-04 |
| GO:0014070 | response to organic cyclic compound                  | 1.55E-04 |
| GO:0042127 | regulation of cell proliferation                     | 1.58E-04 |
| GO:0009141 | nucleoside triphosphate metabolic process            | 1.63E-04 |
| GO:0070887 | cellular response to chemical stimulus               | 1.67E-04 |
| GO:0043410 | positive regulation of MAPK cascade                  | 1.69E-04 |
| GO:0051347 | positive regulation of transferase activity          | 1.71E-04 |
| GO:2000146 | negative regulation of cell motility                 | 1.74E-04 |
| GO:0009199 | ribonucleoside triphosphate metabolic process        | 1.77E-04 |
| GO:0051188 | cofactor biosynthetic process                        | 1.85E-04 |
| GO:0001936 | regulation of endothelial cell proliferation         | 1.95E-04 |
| GO:0034599 | cellular response to oxidative stress                | 1.95E-04 |
| GO:0072358 | cardiovascular system development                    | 1.99E-04 |
| GO:0072359 | circulatory system development                       | 1.99E-04 |
| GO:0051186 | cofactor metabolic process                           | 2.00E-04 |
| GO:0009144 | purine nucleoside triphosphate metabolic process     | 2.03E-04 |
| GO:0038084 | vascular endothelial growth factor signaling pathway | 2.06E-04 |
| GO:0008610 | lipid biosynthetic process                           | 2.20E-04 |
| GO:0006464 | cellular protein modification process                | 2.25E-04 |
| GO:0036211 | protein modification process                         | 2.25E-04 |
| GO:0006629 | lipid metabolic process                              | 2.27E-04 |
| GO:0034655 | nucleobase-containing compound catabolic process     | 2.52E-04 |
| GO:0050673 | epithelial cell proliferation                        | 2.56E-04 |
| GO:0006695 | cholesterol biosynthetic process                     | 2.60E-04 |
| GO:0006195 | purine nucleotide catabolic process                  | 2.75E-04 |
| GO:0045785 | positive regulation of cell adhesion                 | 3.00E-04 |
| GO:0006468 | protein phosphorylation                              | 3.04E-04 |
| GO:0009205 | purine ribonucleoside triphosphate metabolic process | 3.26E-04 |
| GO:0042180 | cellular ketone metabolic process                    | 3.27E-04 |
| GO:0044271 | cellular nitrogen compound biosynthetic process      | 3.39E-04 |
| GO:0072523 | purine-containing compound catabolic process         | 3.41E-04 |
| GO:0006066 | alcohol metabolic process                            | 3.50E-04 |
| GO:0001525 | angiogenesis                                         | 3.64E-04 |
| GO:0001568 | blood vessel development                             | 3.66E-04 |

|            |                                                          |          |
|------------|----------------------------------------------------------|----------|
| GO:0009725 | response to hormone stimulus                             | 3.79E-04 |
| GO:0043085 | positive regulation of catalytic activity                | 3.84E-04 |
| GO:0007010 | cytoskeleton organization                                | 3.87E-04 |
| GO:0043408 | regulation of MAPK cascade                               | 4.09E-04 |
| GO:0033555 | multicellular organismal response to stress              | 4.43E-04 |
| GO:0043648 | dicarboxylic acid metabolic process                      | 4.43E-04 |
| GO:0045445 | myoblast differentiation                                 | 4.51E-04 |
| GO:0051187 | cofactor catabolic process                               | 4.51E-04 |
| GO:0048646 | anatomical structure formation involved in morphogenesis | 4.56E-04 |
| GO:0033674 | positive regulation of kinase activity                   | 4.57E-04 |
| GO:0007243 | intracellular protein kinase cascade                     | 4.62E-04 |
| GO:0045859 | regulation of protein kinase activity                    | 4.64E-04 |
| GO:0009165 | nucleotide biosynthetic process                          | 4.87E-04 |
| GO:0019227 | neuronal action potential propagation                    | 5.00E-04 |
| GO:0048518 | positive regulation of biological process                | 5.00E-04 |
| GO:0043412 | macromolecule modification                               | 5.02E-04 |
| GO:0045595 | regulation of cell differentiation                       | 5.10E-04 |
| GO:0007215 | glutamate receptor signaling pathway                     | 5.23E-04 |
| GO:0071407 | cellular response to organic cyclic compound             | 5.23E-04 |
| GO:0006639 | acylglycerol metabolic process                           | 5.27E-04 |
| GO:0009636 | response to toxin                                        | 5.27E-04 |
| GO:0007265 | Ras protein signal transduction                          | 5.30E-04 |
| GO:0044267 | cellular protein metabolic process                       | 5.45E-04 |
| GO:0006637 | acyl-CoA metabolic process                               | 5.46E-04 |
| GO:0034637 | cellular carbohydrate biosynthetic process               | 5.46E-04 |
| GO:0035383 | thioester metabolic process                              | 5.46E-04 |
| GO:0006638 | neutral lipid metabolic process                          | 5.84E-04 |
| GO:0034654 | nucleobase-containing compound biosynthetic process      | 5.97E-04 |
| GO:0009166 | nucleotide catabolic process                             | 6.08E-04 |
| GO:0065009 | regulation of molecular function                         | 6.10E-04 |
| GO:0019752 | carboxylic acid metabolic process                        | 6.23E-04 |
| GO:0043436 | oxoacid metabolic process                                | 6.23E-04 |
| GO:0048513 | organ development                                        | 6.28E-04 |
| GO:0051349 | positive regulation of lyase activity                    | 6.29E-04 |



|            |                                                        |          |
|------------|--------------------------------------------------------|----------|
| GO:0006082 | organic acid metabolic process                         | 6.40E-04 |
| GO:0006112 | energy reserve metabolic process                       | 6.40E-04 |
| GO:0006694 | steroid biosynthetic process                           | 6.46E-04 |
| GO:0035295 | tube development                                       | 6.55E-04 |
| GO:0007155 | cell adhesion                                          | 6.58E-04 |
| GO:0022610 | biological adhesion                                    | 6.58E-04 |
| GO:0050905 | neuromuscular process                                  | 6.78E-04 |
| GO:0006641 | triglyceride metabolic process                         | 6.79E-04 |
| GO:0046700 | heterocycle catabolic process                          | 6.82E-04 |
| GO:0016125 | sterol metabolic process                               | 7.26E-04 |
| GO:1900542 | regulation of purine nucleotide metabolic process      | 7.26E-04 |
| GO:0044270 | cellular nitrogen compound catabolic process           | 7.36E-04 |
| GO:0006821 | chloride transport                                     | 8.24E-04 |
| GO:0009146 | purine nucleoside triphosphate catabolic process       | 8.37E-04 |
| GO:0048523 | negative regulation of cellular process                | 8.64E-04 |
| GO:0006140 | regulation of nucleotide metabolic process             | 8.87E-04 |
| GO:0006836 | neurotransmitter transport                             | 9.31E-04 |
| GO:0010469 | regulation of receptor activity                        | 9.42E-04 |
| GO:0042981 | regulation of apoptotic process                        | 9.45E-04 |
| GO:0009143 | nucleoside triphosphate catabolic process              | 9.88E-04 |
| GO:0006820 | anion transport                                        | 9.90E-04 |
| GO:0050678 | regulation of epithelial cell proliferation            | 1.06E-03 |
| GO:0015936 | coenzyme A metabolic process                           | 1.10E-03 |
| GO:0007565 | female pregnancy                                       | 1.10E-03 |
| GO:0006915 | apoptotic process                                      | 1.13E-03 |
| GO:0051339 | regulation of lyase activity                           | 1.13E-03 |
| GO:0030001 | metal ion transport                                    | 1.15E-03 |
| GO:0043067 | regulation of programmed cell death                    | 1.19E-03 |
| GO:0008219 | cell death                                             | 1.19E-03 |
| GO:0010839 | negative regulation of keratinocyte proliferation      | 1.22E-03 |
| GO:0034063 | stress granule assembly                                | 1.22E-03 |
| GO:0034614 | cellular response to reactive oxygen species           | 1.22E-03 |
| GO:0070120 | ciliary neurotrophic factor-mediated signaling pathway | 1.22E-03 |
| GO:0008202 | steroid metabolic process                              | 1.24E-03 |

|            |                                                                  |          |
|------------|------------------------------------------------------------------|----------|
| GO:0016265 | death                                                            | 1.24E-03 |
| GO:0035924 | cellular response to vascular endothelial growth factor stimulus | 1.25E-03 |
| GO:0008285 | negative regulation of cell proliferation                        | 1.25E-03 |
| GO:0008088 | axon cargo transport                                             | 1.25E-03 |
| GO:0031399 | regulation of protein modification process                       | 1.27E-03 |
| GO:0048010 | vascular endothelial growth factor receptor signaling pathway    | 1.29E-03 |
| GO:0050790 | regulation of catalytic activity                                 | 1.31E-03 |
| GO:0071363 | cellular response to growth factor stimulus                      | 1.32E-03 |
| GO:0051056 | regulation of small GTPase mediated signal transduction          | 1.32E-03 |
| GO:0006662 | glycerol ether metabolic process                                 | 1.34E-03 |
| GO:0045860 | positive regulation of protein kinase activity                   | 1.39E-03 |
| GO:0048732 | gland development                                                | 1.40E-03 |
| GO:0030073 | insulin secretion                                                | 1.42E-03 |
| GO:0042692 | muscle cell differentiation                                      | 1.47E-03 |
| GO:0012501 | programmed cell death                                            | 1.47E-03 |
| GO:0050900 | leukocyte migration                                              | 1.47E-03 |
| GO:0009203 | ribonucleoside triphosphate catabolic process                    | 1.49E-03 |
| GO:0009207 | purine ribonucleoside triphosphate catabolic process             | 1.49E-03 |
| GO:0051649 | establishment of localization in cell                            | 1.50E-03 |
| GO:0007160 | cell-matrix adhesion                                             | 1.51E-03 |
| GO:0016051 | carbohydrate biosynthetic process                                | 1.52E-03 |
| GO:0046903 | secretion                                                        | 1.53E-03 |
| GO:0051146 | striated muscle cell differentiation                             | 1.53E-03 |
| GO:0010941 | regulation of cell death                                         | 1.63E-03 |
| GO:0007611 | learning or memory                                               | 1.63E-03 |
| GO:0034765 | regulation of ion transmembrane transport                        | 1.63E-03 |
| GO:0007190 | activation of adenylate cyclase activity                         | 1.64E-03 |
| GO:0015807 | L-amino acid transport                                           | 1.64E-03 |
| GO:0060736 | prostate gland growth                                            | 1.65E-03 |
| GO:0050890 | cognition                                                        | 1.65E-03 |
| GO:0071780 | mitotic cell cycle G2-M transition checkpoint                    | 1.65E-03 |
| GO:0070848 | response to growth factor stimulus                               | 1.71E-03 |
| GO:0010975 | regulation of neuron projection development                      | 1.72E-03 |
| GO:0018130 | heterocycle biosynthetic process                                 | 1.72E-03 |

|            |                                                          |          |
|------------|----------------------------------------------------------|----------|
| GO:0032412 | regulation of ion transmembrane transporter activity     | 1.72E-03 |
| GO:0043434 | response to peptide hormone stimulus                     | 1.74E-03 |
| GO:0001894 | tissue homeostasis                                       | 1.81E-03 |
| GO:0051641 | cellular localization                                    | 1.83E-03 |
| GO:0048519 | negative regulation of biological process                | 1.87E-03 |
| GO:0006184 | GTP catabolic process                                    | 1.89E-03 |
| GO:0009154 | purine ribonucleotide catabolic process                  | 1.89E-03 |
| GO:0044057 | regulation of system process                             | 1.89E-03 |
| GO:0003001 | generation of a signal involved in cell-cell signaling   | 1.99E-03 |
| GO:0023061 | signal release                                           | 1.99E-03 |
| GO:0045762 | positive regulation of adenylate cyclase activity        | 2.02E-03 |
| GO:0009261 | ribonucleotide catabolic process                         | 2.04E-03 |
| GO:0044093 | positive regulation of molecular function                | 2.11E-03 |
| GO:0030072 | peptide hormone secretion                                | 2.15E-03 |
| GO:0007214 | gamma-aminobutyric acid signaling pathway                | 2.16E-03 |
| GO:1900449 | regulation of glutamate receptor signaling pathway       | 2.16E-03 |
| GO:0018904 | organic ether metabolic process                          | 2.17E-03 |
| GO:0055002 | striated muscle cell development                         | 2.17E-03 |
| GO:0045666 | positive regulation of neuron differentiation            | 2.19E-03 |
| GO:0015810 | aspartate transport                                      | 2.34E-03 |
| GO:0045761 | regulation of adenylate cyclase activity                 | 2.35E-03 |
| GO:0046364 | monosaccharide biosynthetic process                      | 2.35E-03 |
| GO:0043129 | surfactant homeostasis                                   | 2.38E-03 |
| GO:0048875 | chemical homeostasis within a tissue                     | 2.38E-03 |
| GO:0043066 | negative regulation of apoptotic process                 | 2.40E-03 |
| GO:0031281 | positive regulation of cyclase activity                  | 2.46E-03 |
| GO:0046165 | alcohol biosynthetic process                             | 2.58E-03 |
| GO:0006423 | cysteinyl-tRNA aminoacylation                            | 2.59E-03 |
| GO:0010868 | negative regulation of triglyceride biosynthetic process | 2.59E-03 |
| GO:0035617 | stress granule disassembly                               | 2.59E-03 |
| GO:0042231 | interleukin-13 biosynthetic process                      | 2.59E-03 |
| GO:0015837 | amine transport                                          | 2.62E-03 |
| GO:0045664 | regulation of neuron differentiation                     | 2.68E-03 |
| GO:0007018 | microtubule-based movement                               | 2.73E-03 |

|            |                                                  |          |
|------------|--------------------------------------------------|----------|
| GO:0010039 | response to iron ion                             | 2.76E-03 |
| GO:0050926 | regulation of positive chemotaxis                | 2.76E-03 |
| GO:0072384 | organelle transport along microtubule            | 2.76E-03 |
| GO:0043069 | negative regulation of programmed cell death     | 2.84E-03 |
| GO:0022898 | regulation of transmembrane transporter activity | 2.86E-03 |
| GO:0001569 | patterning of blood vessels                      | 2.97E-03 |
| GO:0002790 | peptide secretion                                | 2.97E-03 |
| GO:0008038 | neuron recognition                               | 2.97E-03 |
| GO:0046039 | GTP metabolic process                            | 3.01E-03 |
| GO:0006950 | response to stress                               | 3.03E-03 |
| GO:0031344 | regulation of cell projection organization       | 3.07E-03 |
| GO:0032268 | regulation of cellular protein metabolic process | 3.07E-03 |
| GO:0031279 | regulation of cyclase activity                   | 3.08E-03 |
| GO:0044255 | cellular lipid metabolic process                 | 3.10E-03 |
| GO:0033002 | muscle cell proliferation                        | 3.14E-03 |
| GO:0048638 | regulation of developmental growth               | 3.14E-03 |
| GO:0009991 | response to extracellular stimulus               | 3.15E-03 |
| GO:0008203 | cholesterol metabolic process                    | 3.31E-03 |
| GO:0055001 | muscle cell development                          | 3.39E-03 |
| GO:0015698 | inorganic anion transport                        | 3.42E-03 |
| GO:0044262 | cellular carbohydrate metabolic process          | 3.42E-03 |
| GO:0060548 | negative regulation of cell death                | 3.44E-03 |
| GO:0051592 | response to calcium ion                          | 3.46E-03 |
| GO:0042596 | fear response                                    | 3.48E-03 |
| GO:0035023 | regulation of Rho protein signal transduction    | 3.49E-03 |
| GO:0010594 | regulation of endothelial cell migration         | 3.53E-03 |
| GO:0000302 | response to reactive oxygen species              | 3.58E-03 |
| GO:0055114 | oxidation-reduction process                      | 3.67E-03 |
| GO:0008015 | blood circulation                                | 3.72E-03 |
| GO:0006006 | glucose metabolic process                        | 3.84E-03 |
| GO:0003013 | circulatory system process                       | 3.89E-03 |
| GO:0006897 | endocytosis                                      | 3.92E-03 |
| GO:0009743 | response to carbohydrate stimulus                | 3.93E-03 |
| GO:0006101 | citrate metabolic process                        | 3.94E-03 |

|            |                                                                  |          |
|------------|------------------------------------------------------------------|----------|
| GO:0006108 | malate metabolic process                                         | 3.94E-03 |
| GO:0006208 | pyrimidine base catabolic process                                | 3.94E-03 |
| GO:0006538 | glutamate catabolic process                                      | 3.94E-03 |
| GO:0048268 | clathrin coat assembly                                           | 3.94E-03 |
| GO:0051775 | response to redox state                                          | 3.94E-03 |
| GO:0051938 | L-glutamate import                                               | 3.94E-03 |
| GO:0072350 | tricarboxylic acid metabolic process                             | 3.94E-03 |
| GO:0071844 | cellular component assembly at cellular level                    | 3.95E-03 |
| GO:0009914 | hormone transport                                                | 4.06E-03 |
| GO:0019318 | hexose metabolic process                                         | 4.08E-03 |
| GO:0040017 | positive regulation of locomotion                                | 4.29E-03 |
| GO:0072522 | purine-containing compound biosynthetic process                  | 4.29E-03 |
| GO:0008299 | isoprenoid biosynthetic process                                  | 4.32E-03 |
| GO:0001937 | negative regulation of endothelial cell proliferation            | 4.32E-03 |
| GO:0006835 | dicarboxylic acid transport                                      | 4.43E-03 |
| GO:0006979 | response to oxidative stress                                     | 4.47E-03 |
| GO:0009123 | nucleoside monophosphate metabolic process                       | 4.49E-03 |
| GO:0030816 | positive regulation of cAMP metabolic process                    | 4.49E-03 |
| GO:0030819 | positive regulation of cAMP biosynthetic process                 | 4.49E-03 |
| GO:0045333 | cellular respiration                                             | 4.49E-03 |
| GO:0046620 | regulation of organ growth                                       | 4.49E-03 |
| GO:0051272 | positive regulation of cellular component movement               | 4.53E-03 |
| GO:0009056 | catabolic process                                                | 4.54E-03 |
| GO:0008016 | regulation of heart contraction                                  | 4.55E-03 |
| GO:0006164 | purine nucleotide biosynthetic process                           | 4.56E-03 |
| GO:0008284 | positive regulation of cell proliferation                        | 4.56E-03 |
| GO:0070507 | regulation of microtubule cytoskeleton organization              | 4.57E-03 |
| GO:0050796 | regulation of insulin secretion                                  | 4.88E-03 |
| GO:0022603 | regulation of anatomical structure morphogenesis                 | 4.90E-03 |
| GO:0042058 | regulation of epidermal growth factor receptor signaling pathway | 4.90E-03 |
| GO:0070301 | cellular response to hydrogen peroxide                           | 4.90E-03 |
| GO:0032886 | regulation of microtubule-based process                          | 4.97E-03 |
| GO:0048167 | regulation of synaptic plasticity                                | 5.03E-03 |
| GO:0007044 | cell-substrate junction assembly                                 | 5.06E-03 |

|            |                                                                       |          |
|------------|-----------------------------------------------------------------------|----------|
| GO:0048871 | multicellular organismal homeostasis                                  | 5.13E-03 |
| GO:0006812 | cation transport                                                      | 5.15E-03 |
| GO:0009110 | vitamin biosynthetic process                                          | 5.29E-03 |
| GO:0005975 | carbohydrate metabolic process                                        | 5.30E-03 |
| GO:0030335 | positive regulation of cell migration                                 | 5.38E-03 |
| GO:0050767 | regulation of neurogenesis                                            | 5.45E-03 |
| GO:0071310 | cellular response to organic substance                                | 5.47E-03 |
| GO:0030817 | regulation of cAMP biosynthetic process                               | 5.52E-03 |
| GO:0071702 | organic substance transport                                           | 5.57E-03 |
| GO:0046847 | filopodium assembly                                                   | 5.61E-03 |
| GO:0001964 | startle response                                                      | 5.80E-03 |
| GO:0007413 | axonal fasciculation                                                  | 5.80E-03 |
| GO:0071312 | cellular response to alkaloid                                         | 5.80E-03 |
| GO:0042364 | water-soluble vitamin biosynthetic process                            | 6.08E-03 |
| GO:0042415 | norepinephrine metabolic process                                      | 6.08E-03 |
| GO:0046113 | nucleobase catabolic process                                          | 6.08E-03 |
| GO:0048514 | blood vessel morphogenesis                                            | 6.27E-03 |
| GO:0046879 | hormone secretion                                                     | 6.32E-03 |
| GO:2000147 | positive regulation of cell motility                                  | 6.32E-03 |
| GO:0031532 | actin cytoskeleton reorganization                                     | 6.38E-03 |
| GO:0015833 | peptide transport                                                     | 6.39E-03 |
| GO:0031111 | negative regulation of microtubule polymerization or depolymerization | 6.40E-03 |
| GO:0009611 | response to wounding                                                  | 6.52E-03 |
| GO:0048771 | tissue remodeling                                                     | 6.56E-03 |
| GO:0010647 | positive regulation of cell communication                             | 6.60E-03 |
| GO:0030814 | regulation of cAMP metabolic process                                  | 6.63E-03 |
| GO:0043269 | regulation of ion transport                                           | 6.66E-03 |
| GO:0044248 | cellular catabolic process                                            | 6.70E-03 |
| GO:0007618 | mating                                                                | 6.77E-03 |
| GO:0034103 | regulation of tissue remodeling                                       | 6.77E-03 |
| GO:0030804 | positive regulation of cyclic nucleotide biosynthetic process         | 7.09E-03 |
| GO:0010811 | positive regulation of cell-substrate adhesion                        | 7.23E-03 |
| GO:0019319 | hexose biosynthetic process                                           | 7.32E-03 |
| GO:0060284 | regulation of cell development                                        | 7.37E-03 |

|            |                                                                                                  |          |
|------------|--------------------------------------------------------------------------------------------------|----------|
| GO:0006106 | fumarate metabolic process                                                                       | 7.38E-03 |
| GO:0009448 | gamma-aminobutyric acid metabolic process                                                        | 7.38E-03 |
| GO:0010881 | regulation of cardiac muscle contraction by regulation of the release of sequestered calcium ion | 7.38E-03 |
| GO:0019896 | axon transport of mitochondrion                                                                  | 7.38E-03 |
| GO:0042816 | vitamin B6 metabolic process                                                                     | 7.38E-03 |
| GO:0042819 | vitamin B6 biosynthetic process                                                                  | 7.38E-03 |
| GO:0043490 | malate-aspartate shuttle                                                                         | 7.38E-03 |
| GO:0048014 | Tie receptor signaling pathway                                                                   | 7.38E-03 |
| GO:0060312 | regulation of blood vessel remodeling                                                            | 7.38E-03 |
| GO:0070777 | D-aspartate transport                                                                            | 7.38E-03 |
| GO:0070779 | D-aspartate import                                                                               | 7.38E-03 |
| GO:0019538 | protein metabolic process                                                                        | 7.42E-03 |
| GO:0030260 | entry into host cell                                                                             | 7.43E-03 |
| GO:0030949 | positive regulation of vascular endothelial growth factor receptor signaling pathway             | 7.43E-03 |
| GO:0044409 | entry into host                                                                                  | 7.43E-03 |
| GO:0051806 | entry into cell of other organism involved in symbiotic interaction                              | 7.43E-03 |
| GO:0051828 | entry into other organism involved in symbiotic interaction                                      | 7.43E-03 |
| GO:0052126 | movement in host environment                                                                     | 7.43E-03 |
| GO:0052192 | movement in environment of other organism involved in symbiotic interaction                      | 7.43E-03 |
| GO:0048585 | negative regulation of response to stimulus                                                      | 7.56E-03 |
| GO:0033865 | nucleoside bisphosphate metabolic process                                                        | 7.67E-03 |
| GO:0023056 | positive regulation of signaling                                                                 | 7.77E-03 |
| GO:0009066 | aspartate family amino acid metabolic process                                                    | 7.83E-03 |
| GO:0071495 | cellular response to endogenous stimulus                                                         | 7.86E-03 |
| GO:0007017 | microtubule-based process                                                                        | 7.86E-03 |
| GO:0031667 | response to nutrient levels                                                                      | 7.86E-03 |
| GO:0030810 | positive regulation of nucleotide biosynthetic process                                           | 7.89E-03 |
| GO:0044264 | cellular polysaccharide metabolic process                                                        | 7.89E-03 |
| GO:1900373 | positive regulation of purine nucleotide biosynthetic process                                    | 7.89E-03 |
| GO:0008286 | insulin receptor signaling pathway                                                               | 8.06E-03 |
| GO:0050804 | regulation of synaptic transmission                                                              | 8.06E-03 |
| GO:0001505 | regulation of neurotransmitter levels                                                            | 8.07E-03 |
| GO:0001655 | urogenital system development                                                                    | 8.10E-03 |
| GO:0006936 | muscle contraction                                                                               | 8.10E-03 |

|            |                                                                       |          |
|------------|-----------------------------------------------------------------------|----------|
| GO:0032409 | regulation of transporter activity                                    | 8.15E-03 |
| GO:0070588 | calcium ion transmembrane transport                                   | 8.16E-03 |
| GO:0010740 | positive regulation of intracellular protein kinase cascade           | 8.17E-03 |
| GO:0009888 | tissue development                                                    | 8.47E-03 |
| GO:0010648 | negative regulation of cell communication                             | 8.72E-03 |
| GO:0023057 | negative regulation of signaling                                      | 8.72E-03 |
| GO:0030801 | positive regulation of cyclic nucleotide metabolic process            | 8.76E-03 |
| GO:0035335 | peptidyl-tyrosine dephosphorylation                                   | 8.76E-03 |
| GO:0007171 | activation of transmembrane receptor protein tyrosine kinase activity | 8.77E-03 |
| GO:0032331 | negative regulation of chondrocyte differentiation                    | 8.77E-03 |
| GO:0045749 | negative regulation of S phase of mitotic cell cycle                  | 8.77E-03 |
| GO:0060292 | long term synaptic depression                                         | 8.77E-03 |
| GO:0060384 | innervation                                                           | 8.77E-03 |
| GO:0008584 | male gonad development                                                | 8.81E-03 |
| GO:0010906 | regulation of glucose metabolic process                               | 8.84E-03 |
| GO:0035265 | organ growth                                                          | 8.84E-03 |
| GO:0090276 | regulation of peptide hormone secretion                               | 8.90E-03 |
| GO:0051130 | positive regulation of cellular component organization                | 8.94E-03 |
| GO:0090287 | regulation of cellular response to growth factor stimulus             | 9.11E-03 |
| GO:0060443 | mammary gland morphogenesis                                           | 9.18E-03 |
| GO:0030879 | mammary gland development                                             | 9.23E-03 |
| GO:0032940 | secretion by cell                                                     | 9.29E-03 |
| GO:0015813 | L-glutamate transport                                                 | 9.33E-03 |
| GO:0031113 | regulation of microtubule polymerization                              | 9.33E-03 |
| GO:0043279 | response to alkaloid                                                  | 9.33E-03 |
| GO:0046546 | development of primary male sexual characteristics                    | 9.45E-03 |
| GO:0050680 | negative regulation of epithelial cell proliferation                  | 9.68E-03 |
| GO:0014065 | phosphatidylinositol 3-kinase cascade                                 | 9.70E-03 |
| GO:0044237 | cellular metabolic process                                            | 9.81E-03 |



**C**

| <b>Accession</b> | <b>GO Term Biological Processes enriched in down regulated genes</b> | <b>Robin</b> |
|------------------|----------------------------------------------------------------------|--------------|
| GO:0030030       | cell projection organization                                         | 1.20E-07     |
| GO:0016043       | cellular component organization                                      | 1.08E-06     |
| GO:0071840       | cellular component organization or biogenesis                        | 2.18E-06     |
| GO:0071842       | cellular component organization at cellular level                    | 2.63E-06     |
| GO:0071841       | cellular component organization or biogenesis at cellular level      | 4.78E-06     |
| GO:0009653       | anatomical structure morphogenesis                                   | 5.18E-06     |
| GO:0048858       | cell projection morphogenesis                                        | 6.27E-06     |
| GO:0032990       | cell part morphogenesis                                              | 8.10E-06     |
| GO:0048869       | cellular developmental process                                       | 1.15E-05     |
| GO:0048667       | cell morphogenesis involved in neuron differentiation                | 1.50E-05     |
| GO:0000904       | cell morphogenesis involved in differentiation                       | 2.92E-05     |
| GO:0000902       | cell morphogenesis                                                   | 3.21E-05     |
| GO:0030154       | cell differentiation                                                 | 4.89E-05     |
| GO:0032502       | developmental process                                                | 5.12E-05     |
| GO:0048812       | neuron projection morphogenesis                                      | 5.21E-05     |
| GO:0023052       | signaling                                                            | 5.49E-05     |
| GO:0048856       | anatomical structure development                                     | 7.29E-05     |
| GO:0007399       | nervous system development                                           | 8.05E-05     |
| GO:0032989       | cellular component morphogenesis                                     | 8.25E-05     |
| GO:0007154       | cell communication                                                   | 8.67E-05     |
| GO:0007165       | signal transduction                                                  | 9.39E-05     |
| GO:0016568       | chromatin modification                                               | 1.33E-04     |
| GO:0040011       | locomotion                                                           | 1.95E-04     |
| GO:0016570       | histone modification                                                 | 1.98E-04     |

|            |                                                                  |          |
|------------|------------------------------------------------------------------|----------|
| GO:0007275 | multicellular organismal development                             | 1.98E-04 |
| GO:0042522 | regulation of tyrosine phosphorylation of Stat5 protein          | 1.99E-04 |
| GO:0006928 | cellular component movement                                      | 2.00E-04 |
| GO:0031175 | neuron projection development                                    | 2.03E-04 |
| GO:0043954 | cellular component maintenance                                   | 2.12E-04 |
| GO:0048666 | neuron development                                               | 2.22E-04 |
| GO:0016569 | covalent chromatin modification                                  | 2.49E-04 |
| GO:0007409 | axonogenesis                                                     | 3.46E-04 |
| GO:0042506 | tyrosine phosphorylation of Stat5 protein                        | 3.61E-04 |
| GO:0007411 | axon guidance                                                    | 3.91E-04 |
| GO:0050794 | regulation of cellular process                                   | 4.05E-04 |
| GO:0009790 | embryo development                                               | 4.22E-04 |
| GO:0048731 | system development                                               | 4.66E-04 |
| GO:0007167 | enzyme linked receptor protein signaling pathway                 | 5.18E-04 |
| GO:0032501 | multicellular organismal process                                 | 5.98E-04 |
| GO:0045494 | photoreceptor cell maintenance                                   | 6.02E-04 |
| GO:0007169 | transmembrane receptor protein tyrosine kinase signaling pathway | 6.18E-04 |
| GO:0048699 | generation of neurons                                            | 7.18E-04 |
| GO:0035234 | germ cell programmed cell death                                  | 7.41E-04 |
| GO:0051716 | cellular response to stimulus                                    | 7.82E-04 |
| GO:0022008 | neurogenesis                                                     | 8.44E-04 |
| GO:0030182 | neuron differentiation                                           | 9.80E-04 |
| GO:0034204 | lipid translocation                                              | 1.00E-03 |
| GO:0045332 | phospholipid translocation                                       | 1.00E-03 |
| GO:0007018 | microtubule-based movement                                       | 1.16E-03 |
| GO:0002028 | regulation of sodium ion transport                               | 1.39E-03 |
| GO:0022029 | telencephalon cell migration                                     | 1.39E-03 |
| GO:0022610 | biological adhesion                                              | 1.40E-03 |
| GO:0007155 | cell adhesion                                                    | 1.40E-03 |
| GO:0065007 | biological regulation                                            | 1.42E-03 |
| GO:0033152 | immunoglobulin V(D)J recombination                               | 1.47E-03 |
| GO:0048496 | maintenance of organ identity                                    | 1.47E-03 |
| GO:0006325 | chromatin organization                                           | 1.51E-03 |
| GO:0018205 | peptidyl-lysine modification                                     | 1.54E-03 |

|            |                                                                                     |          |
|------------|-------------------------------------------------------------------------------------|----------|
| GO:0007166 | cell surface receptor signaling pathway                                             | 1.55E-03 |
| GO:0007420 | brain development                                                                   | 1.57E-03 |
| GO:0060113 | inner ear receptor cell differentiation                                             | 1.57E-03 |
| GO:0021885 | forebrain cell migration                                                            | 1.76E-03 |
| GO:0042523 | positive regulation of tyrosine phosphorylation of Stat5 protein                    | 1.90E-03 |
| GO:0006357 | regulation of transcription from RNA polymerase II promoter                         | 2.06E-03 |
| GO:0050793 | regulation of developmental process                                                 | 2.18E-03 |
| GO:0010390 | histone monoubiquitination                                                          | 2.28E-03 |
| GO:0090286 | cytoskeletal anchoring at nuclear membrane                                          | 2.43E-03 |
| GO:0002024 | diet induced thermogenesis                                                          | 2.43E-03 |
| GO:0048468 | cell development                                                                    | 2.44E-03 |
| GO:0042490 | mechanoreceptor differentiation                                                     | 2.44E-03 |
| GO:0009987 | cellular process                                                                    | 2.53E-03 |
| GO:0051270 | regulation of cellular component movement                                           | 2.59E-03 |
| GO:0097035 | regulation of membrane lipid distribution                                           | 2.70E-03 |
| GO:0007517 | muscle organ development                                                            | 2.85E-03 |
| GO:0048513 | organ development                                                                   | 2.87E-03 |
| GO:0046209 | nitric oxide metabolic process                                                      | 2.99E-03 |
| GO:0009628 | response to abiotic stimulus                                                        | 3.13E-03 |
| GO:0050789 | regulation of biological process                                                    | 3.14E-03 |
| GO:0048839 | inner ear development                                                               | 3.47E-03 |
| GO:0060425 | lung morphogenesis                                                                  | 3.61E-03 |
| GO:0060501 | positive regulation of epithelial cell proliferation involved in lung morphogenesis | 3.61E-03 |
| GO:0060013 | righting reflex                                                                     | 3.61E-03 |
| GO:0060429 | epithelium development                                                              | 3.65E-03 |
| GO:0008045 | motor axon guidance                                                                 | 3.68E-03 |
| GO:0044253 | positive regulation of multicellular organismal metabolic process                   | 3.68E-03 |
| GO:0007417 | central nervous system development                                                  | 3.78E-03 |
| GO:0007266 | Rho protein signal transduction                                                     | 3.85E-03 |
| GO:0048870 | cell motility                                                                       | 3.86E-03 |
| GO:0051674 | localization of cell                                                                | 3.86E-03 |
| GO:0051173 | positive regulation of nitrogen compound metabolic process                          | 3.86E-03 |
| GO:0001539 | ciliary or flagellar motility                                                       | 4.25E-03 |
| GO:0035272 | exocrine system development                                                         | 4.31E-03 |

|            |                                                                            |          |
|------------|----------------------------------------------------------------------------|----------|
| GO:0060541 | respiratory system development                                             | 4.52E-03 |
| GO:0061061 | muscle structure development                                               | 4.60E-03 |
| GO:0016925 | protein sumoylation                                                        | 4.86E-03 |
| GO:0018193 | peptidyl-amino acid modification                                           | 4.95E-03 |
| GO:0050957 | equilibrioception                                                          | 4.99E-03 |
| GO:0035518 | histone H2A monoubiquitination                                             | 4.99E-03 |
| GO:0055091 | phospholipid homeostasis                                                   | 4.99E-03 |
| GO:0033235 | positive regulation of protein sumoylation                                 | 4.99E-03 |
| GO:2000794 | regulation of epithelial cell proliferation involved in lung morphogenesis | 4.99E-03 |
| GO:0055098 | response to low-density lipoprotein particle stimulus                      | 4.99E-03 |
| GO:0022028 | tangential migration from the subventricular zone to the olfactory bulb    | 4.99E-03 |
| GO:0043967 | histone H4 acetylation                                                     | 5.10E-03 |
| GO:0045935 | positive regulation of nucleobase-containing compound metabolic process    | 5.36E-03 |
| GO:0051276 | chromosome organization                                                    | 5.41E-03 |
| GO:0021772 | olfactory bulb development                                                 | 5.53E-03 |
| GO:0021988 | olfactory lobe development                                                 | 5.53E-03 |
| GO:0051050 | positive regulation of transport                                           | 5.82E-03 |
| GO:0032879 | regulation of localization                                                 | 5.97E-03 |
| GO:0009888 | tissue development                                                         | 6.14E-03 |
| GO:0002790 | peptide secretion                                                          | 6.21E-03 |
| GO:0009268 | response to pH                                                             | 6.24E-03 |
| GO:0051897 | positive regulation of protein kinase B signaling cascade                  | 6.46E-03 |
| GO:0060502 | epithelial cell proliferation involved in lung morphogenesis               | 6.59E-03 |
| GO:0021537 | telencephalon development                                                  | 6.74E-03 |
| GO:0030324 | lung development                                                           | 7.00E-03 |
| GO:0044246 | regulation of multicellular organismal metabolic process                   | 7.01E-03 |
| GO:0016573 | histone acetylation                                                        | 7.15E-03 |
| GO:0032388 | positive regulation of intracellular transport                             | 7.15E-03 |
| GO:0031344 | regulation of cell projection organization                                 | 7.24E-03 |
| GO:0010975 | regulation of neuron projection development                                | 7.34E-03 |
| GO:0031328 | positive regulation of cellular biosynthetic process                       | 7.52E-03 |
| GO:0006897 | endocytosis                                                                | 7.53E-03 |
| GO:0040012 | regulation of locomotion                                                   | 7.63E-03 |
| GO:0051179 | localization                                                               | 7.80E-03 |

|            |                                                                               |          |
|------------|-------------------------------------------------------------------------------|----------|
| GO:0018393 | internal peptidyl-lysine acetylation                                          | 7.81E-03 |
| GO:0030323 | respiratory tube development                                                  | 7.83E-03 |
| GO:0042509 | regulation of tyrosine phosphorylation of STAT protein                        | 8.04E-03 |
| GO:0048266 | behavioral response to pain                                                   | 8.39E-03 |
| GO:0031958 | corticosteroid receptor signaling pathway                                     | 8.39E-03 |
| GO:0042921 | glucocorticoid receptor signaling pathway                                     | 8.39E-03 |
| GO:0043949 | regulation of cAMP-mediated signaling                                         | 8.39E-03 |
| GO:0033233 | regulation of protein sumoylation                                             | 8.39E-03 |
| GO:0009887 | organ morphogenesis                                                           | 8.46E-03 |
| GO:0010927 | cellular component assembly involved in morphogenesis                         | 8.51E-03 |
| GO:0018394 | peptidyl-lysine acetylation                                                   | 8.51E-03 |
| GO:0050954 | sensory perception of mechanical stimulus                                     | 8.51E-03 |
| GO:0006513 | protein monoubiquitination                                                    | 8.71E-03 |
| GO:0072332 | signal transduction by p53 class mediator resulting in induction of apoptosis | 8.71E-03 |
| GO:0006935 | chemotaxis                                                                    | 9.10E-03 |
| GO:0042330 | taxis                                                                         | 9.10E-03 |
| GO:0009891 | positive regulation of biosynthetic process                                   | 9.36E-03 |
| GO:0043583 | ear development                                                               | 9.38E-03 |
| GO:0015833 | peptide transport                                                             | 9.46E-03 |
| GO:0006475 | internal protein amino acid acetylation                                       | 9.64E-03 |
| GO:0048646 | anatomical structure formation involved in morphogenesis                      | 9.65E-03 |
| GO:0060038 | cardiac muscle cell proliferation                                             | 9.65E-03 |
| GO:0016574 | histone ubiquitination                                                        | 9.65E-03 |
| GO:0009605 | response to external stimulus                                                 | 9.76E-03 |

**D**

| <b>Accession</b> | <b>GO Term Biological Processes enriched in down regulated genes</b> | <b>Canary</b> |
|------------------|----------------------------------------------------------------------|---------------|
| GO:0071842       | cellular component organization at cellular level                    | 1.18E-14      |
| GO:0016043       | cellular component organization                                      | 1.46E-14      |
| GO:0071841       | cellular component organization or biogenesis at cellular level      | 5.97E-14      |
| GO:0006996       | organelle organization                                               | 8.99E-14      |
| GO:0071840       | cellular component organization or biogenesis                        | 2.71E-13      |
| GO:0051276       | chromosome organization                                              | 3.27E-10      |
| GO:0016568       | chromatin modification                                               | 9.74E-10      |
| GO:0009987       | cellular process                                                     | 1.55E-09      |
| GO:0022402       | cell cycle process                                                   | 2.94E-09      |
| GO:0055085       | transmembrane transport                                              | 1.51E-08      |
| GO:0006281       | DNA repair                                                           | 6.32E-08      |
| GO:0007010       | cytoskeleton organization                                            | 9.71E-08      |
| GO:0007049       | cell cycle                                                           | 1.48E-07      |
| GO:0022403       | cell cycle phase                                                     | 4.48E-07      |
| GO:0016570       | histone modification                                                 | 9.72E-07      |
| GO:0000278       | mitotic cell cycle                                                   | 1.24E-06      |
| GO:0030030       | cell projection organization                                         | 1.56E-06      |
| GO:0042384       | cilium assembly                                                      | 1.93E-06      |
| GO:0016569       | covalent chromatin modification                                      | 2.10E-06      |
| GO:0030031       | cell projection assembly                                             | 2.64E-06      |
| GO:0006325       | chromatin organization                                               | 2.65E-06      |
| GO:0051179       | localization                                                         | 2.68E-06      |
| GO:0071897       | DNA biosynthetic process                                             | 2.99E-06      |
| GO:0007017       | microtubule-based process                                            | 4.03E-06      |
| GO:0051297       | centrosome organization                                              | 4.80E-06      |
| GO:0006260       | DNA replication                                                      | 4.94E-06      |
| GO:0006811       | ion transport                                                        | 5.08E-06      |
| GO:0007163       | establishment or maintenance of cell polarity                        | 7.90E-06      |
| GO:0010927       | cellular component assembly involved in morphogenesis                | 1.04E-05      |
| GO:0006261       | DNA-dependent DNA replication                                        | 1.07E-05      |

|            |                                                         |          |
|------------|---------------------------------------------------------|----------|
| GO:0032502 | developmental process                                   | 1.08E-05 |
| GO:0006302 | double-strand break repair                              | 1.08E-05 |
| GO:0060271 | cilium morphogenesis                                    | 1.58E-05 |
| GO:0018205 | peptidyl-lysine modification                            | 1.70E-05 |
| GO:0032989 | cellular component morphogenesis                        | 1.73E-05 |
| GO:0031023 | microtubule organizing center organization              | 1.86E-05 |
| GO:0032508 | DNA duplex unwinding                                    | 2.19E-05 |
| GO:0051298 | centrosome duplication                                  | 2.19E-05 |
| GO:0048869 | cellular developmental process                          | 2.66E-05 |
| GO:0000902 | cell morphogenesis                                      | 2.72E-05 |
| GO:0006259 | DNA metabolic process                                   | 3.07E-05 |
| GO:0032392 | DNA geometric change                                    | 3.35E-05 |
| GO:0032501 | multicellular organismal process                        | 3.73E-05 |
| GO:0000279 | M phase                                                 | 5.18E-05 |
| GO:0048858 | cell projection morphogenesis                           | 5.27E-05 |
| GO:0048856 | anatomical structure development                        | 5.29E-05 |
| GO:0030010 | establishment of cell polarity                          | 5.62E-05 |
| GO:0000226 | microtubule cytoskeleton organization                   | 5.67E-05 |
| GO:0018394 | peptidyl-lysine acetylation                             | 8.04E-05 |
| GO:0032990 | cell part morphogenesis                                 | 9.36E-05 |
| GO:0007098 | centrosome cycle                                        | 9.39E-05 |
| GO:0000724 | double-strand break repair via homologous recombination | 9.68E-05 |
| GO:0051056 | regulation of small GTPase mediated signal transduction | 1.01E-04 |
| GO:0016573 | histone acetylation                                     | 1.10E-04 |
| GO:0009653 | anatomical structure morphogenesis                      | 1.21E-04 |
| GO:0000725 | recombinational repair                                  | 1.25E-04 |
| GO:0034968 | histone lysine methylation                              | 1.26E-04 |
| GO:0006475 | internal protein amino acid acetylation                 | 1.30E-04 |
| GO:0051647 | nucleus localization                                    | 1.44E-04 |
| GO:0018393 | internal peptidyl-lysine acetylation                    | 1.52E-04 |
| GO:0000086 | G2-M transition of mitotic cell cycle                   | 1.58E-04 |
| GO:0006464 | cellular protein modification process                   | 1.70E-04 |
| GO:0036211 | protein modification process                            | 1.70E-04 |
| GO:0061061 | muscle structure development                            | 1.72E-04 |

|            |                                               |          |
|------------|-----------------------------------------------|----------|
| GO:0006310 | DNA recombination                             | 1.78E-04 |
| GO:0050793 | regulation of developmental process           | 1.93E-04 |
| GO:0071702 | organic substance transport                   | 1.93E-04 |
| GO:0006473 | protein acetylation                           | 2.03E-04 |
| GO:0000132 | establishment of mitotic spindle orientation  | 2.12E-04 |
| GO:0010824 | regulation of centrosome duplication          | 2.12E-04 |
| GO:0031060 | regulation of histone methylation             | 2.12E-04 |
| GO:0051294 | establishment of spindle orientation          | 2.12E-04 |
| GO:0035023 | regulation of Rho protein signal transduction | 2.13E-04 |
| GO:0043967 | histone H4 acetylation                        | 2.21E-04 |
| GO:0051293 | establishment of spindle localization         | 2.44E-04 |
| GO:0051653 | spindle localization                          | 2.44E-04 |
| GO:0022610 | biological adhesion                           | 2.76E-04 |
| GO:0007155 | cell adhesion                                 | 2.76E-04 |
| GO:0000731 | DNA synthesis involved in DNA repair          | 2.86E-04 |
| GO:0031061 | negative regulation of histone methylation    | 3.13E-04 |
| GO:0051325 | interphase                                    | 3.17E-04 |
| GO:0016571 | histone methylation                           | 3.25E-04 |
| GO:0046578 | regulation of Ras protein signal transduction | 3.54E-04 |
| GO:0034661 | ncRNA catabolic process                       | 3.83E-04 |
| GO:0046605 | regulation of centrosome cycle                | 3.96E-04 |
| GO:0048468 | cell development                              | 4.22E-04 |
| GO:0030029 | actin filament-based process                  | 4.45E-04 |
| GO:0007517 | muscle organ development                      | 4.63E-04 |
| GO:0007266 | Rho protein signal transduction               | 4.64E-04 |
| GO:0006974 | response to DNA damage stimulus               | 4.82E-04 |
| GO:0043412 | macromolecule modification                    | 5.04E-04 |
| GO:0051329 | interphase of mitotic cell cycle              | 5.05E-04 |
| GO:0043543 | protein acylation                             | 5.09E-04 |
| GO:0000768 | syncytium formation by plasma membrane fusion | 5.70E-04 |
| GO:0006301 | postreplication repair                        | 5.70E-04 |
| GO:0051234 | establishment of localization                 | 5.95E-04 |
| GO:0060537 | muscle tissue development                     | 5.96E-04 |
| GO:0040001 | establishment of mitotic spindle localization | 6.48E-04 |



|            |                                                                                     |          |
|------------|-------------------------------------------------------------------------------------|----------|
| GO:0090286 | cytoskeletal anchoring at nuclear membrane                                          | 7.16E-04 |
| GO:0016075 | rRNA catabolic process                                                              | 7.56E-04 |
| GO:0043966 | histone H3 acetylation                                                              | 8.17E-04 |
| GO:0018193 | peptidyl-amino acid modification                                                    | 8.28E-04 |
| GO:0043984 | histone H4-K16 acetylation                                                          | 9.29E-04 |
| GO:0021955 | central nervous system neuron axonogenesis                                          | 1.04E-03 |
| GO:0006869 | lipid transport                                                                     | 1.10E-03 |
| GO:0007275 | multicellular organismal development                                                | 1.12E-03 |
| GO:0046777 | protein autophosphorylation                                                         | 1.12E-03 |
| GO:0051960 | regulation of nervous system development                                            | 1.14E-03 |
| GO:0015695 | organic cation transport                                                            | 1.16E-03 |
| GO:0051052 | regulation of DNA metabolic process                                                 | 1.16E-03 |
| GO:0006479 | protein methylation                                                                 | 1.18E-03 |
| GO:0008213 | protein alkylation                                                                  | 1.18E-03 |
| GO:0000723 | telomere maintenance                                                                | 1.34E-03 |
| GO:0030198 | extracellular matrix organization                                                   | 1.34E-03 |
| GO:0043062 | extracellular structure organization                                                | 1.34E-03 |
| GO:0006928 | cellular component movement                                                         | 1.35E-03 |
| GO:0006200 | ATP catabolic process                                                               | 1.38E-03 |
| GO:0021834 | chemorepulsion involved in embryonic olfactory bulb interneuron precursor migration | 1.43E-03 |
| GO:0030951 | establishment or maintenance of microtubule cytoskeleton polarity                   | 1.43E-03 |
| GO:0034653 | retinoic acid catabolic process                                                     | 1.43E-03 |
| GO:0050955 | thermoception                                                                       | 1.43E-03 |
| GO:0071321 | cellular response to cGMP                                                           | 1.43E-03 |
| GO:0014706 | striated muscle tissue development                                                  | 1.52E-03 |
| GO:0022029 | telencephalon cell migration                                                        | 1.54E-03 |
| GO:0006622 | protein targeting to lysosome                                                       | 1.55E-03 |
| GO:0006623 | protein targeting to vacuole                                                        | 1.55E-03 |
| GO:0031062 | positive regulation of histone methylation                                          | 1.55E-03 |
| GO:0040023 | establishment of nucleus localization                                               | 1.55E-03 |
| GO:0051569 | regulation of histone H3-K4 methylation                                             | 1.55E-03 |
| GO:0072665 | protein localization to vacuole                                                     | 1.55E-03 |
| GO:0072666 | establishment of protein localization to vacuole                                    | 1.55E-03 |
| GO:0032200 | telomere organization                                                               | 1.60E-03 |

|            |                                                       |          |
|------------|-------------------------------------------------------|----------|
| GO:0006814 | sodium ion transport                                  | 1.72E-03 |
| GO:0033554 | cellular response to stress                           | 1.72E-03 |
| GO:0060249 | anatomical structure homeostasis                      | 1.72E-03 |
| GO:0034204 | lipid translocation                                   | 1.73E-03 |
| GO:0045332 | phospholipid translocation                            | 1.73E-03 |
| GO:0021952 | central nervous system projection neuron axonogenesis | 1.73E-03 |
| GO:0007044 | cell-substrate junction assembly                      | 1.75E-03 |
| GO:0010876 | lipid localization                                    | 1.81E-03 |
| GO:0001843 | neural tube closure                                   | 1.85E-03 |
| GO:0022607 | cellular component assembly                           | 1.87E-03 |
| GO:0007140 | male meiosis                                          | 1.92E-03 |
| GO:0051568 | histone H3-K4 methylation                             | 1.92E-03 |
| GO:0033043 | regulation of organelle organization                  | 1.96E-03 |
| GO:0030859 | polarized epithelial cell differentiation             | 2.00E-03 |
| GO:0051571 | positive regulation of histone H3-K4 methylation      | 2.00E-03 |
| GO:0070486 | leukocyte aggregation                                 | 2.00E-03 |
| GO:0007059 | chromosome segregation                                | 2.12E-03 |
| GO:0065007 | biological regulation                                 | 2.20E-03 |
| GO:0060606 | tube closure                                          | 2.21E-03 |
| GO:0007127 | meiosis I                                             | 2.26E-03 |
| GO:0051716 | cellular response to stimulus                         | 2.35E-03 |
| GO:0097035 | regulation of membrane lipid distribution             | 2.36E-03 |
| GO:0051726 | regulation of cell cycle                              | 2.40E-03 |
| GO:0030154 | cell differentiation                                  | 2.43E-03 |
| GO:0007126 | meiosis                                               | 2.46E-03 |
| GO:0051327 | M phase of meiotic cell cycle                         | 2.46E-03 |
| GO:0051640 | organelle localization                                | 2.46E-03 |
| GO:0021885 | forebrain cell migration                              | 2.61E-03 |
| GO:0001556 | oocyte maturation                                     | 2.74E-03 |
| GO:0006949 | syncytium formation                                   | 2.74E-03 |
| GO:0007099 | centriole replication                                 | 2.74E-03 |
| GO:0050919 | negative chemotaxis                                   | 2.74E-03 |
| GO:0000280 | nuclear division                                      | 2.78E-03 |
| GO:0007067 | mitosis                                               | 2.78E-03 |

|            |                                                                         |          |
|------------|-------------------------------------------------------------------------|----------|
| GO:0007520 | myoblast fusion                                                         | 2.80E-03 |
| GO:0048666 | neuron development                                                      | 2.81E-03 |
| GO:0007265 | Ras protein signal transduction                                         | 2.93E-03 |
| GO:0022604 | regulation of cell morphogenesis                                        | 3.03E-03 |
| GO:0051321 | meiotic cell cycle                                                      | 3.03E-03 |
| GO:0014020 | primary neural tube formation                                           | 3.11E-03 |
| GO:0006468 | protein phosphorylation                                                 | 3.21E-03 |
| GO:0065008 | regulation of biological quality                                        | 3.22E-03 |
| GO:0006810 | transport                                                               | 3.26E-03 |
| GO:0015914 | phospholipid transport                                                  | 3.33E-03 |
| GO:0000087 | M phase of mitotic cell cycle                                           | 3.50E-03 |
| GO:0055088 | lipid homeostasis                                                       | 3.57E-03 |
| GO:0017158 | regulation of calcium ion-dependent exocytosis                          | 3.59E-03 |
| GO:0061180 | mammary gland epithelium development                                    | 3.67E-03 |
| GO:0008015 | blood circulation                                                       | 4.09E-03 |
| GO:0043981 | histone H4-K5 acetylation                                               | 4.13E-03 |
| GO:0043982 | histone H4-K8 acetylation                                               | 4.13E-03 |
| GO:0022028 | tangential migration from the subventricular zone to the olfactory bulb | 4.25E-03 |
| GO:0009111 | vitamin catabolic process                                               | 4.25E-03 |
| GO:0042363 | fat-soluble vitamin catabolic process                                   | 4.25E-03 |
| GO:0043983 | histone H4-K12 acetylation                                              | 4.25E-03 |
| GO:0048096 | chromatin-mediated maintenance of transcription                         | 4.25E-03 |
| GO:0051570 | regulation of histone H3-K9 methylation                                 | 4.25E-03 |
| GO:0060177 | regulation of angiotensin metabolic process                             | 4.25E-03 |
| GO:0003013 | circulatory system process                                              | 4.38E-03 |
| GO:0006820 | anion transport                                                         | 4.57E-03 |
| GO:0007143 | female meiosis                                                          | 4.66E-03 |
| GO:0048841 | regulation of axon extension involved in axon guidance                  | 4.66E-03 |
| GO:0050667 | homocysteine metabolic process                                          | 4.66E-03 |
| GO:0007160 | cell-matrix adhesion                                                    | 4.79E-03 |
| GO:0008037 | cell recognition                                                        | 4.91E-03 |
| GO:0031175 | neuron projection development                                           | 4.93E-03 |
| GO:0007399 | nervous system development                                              | 5.07E-03 |
| GO:0033152 | immunoglobulin V(D)J recombination                                      | 5.08E-03 |

|            |                                                                     |          |
|------------|---------------------------------------------------------------------|----------|
| GO:0000019 | regulation of mitotic recombination                                 | 5.08E-03 |
| GO:0001778 | plasma membrane repair                                              | 5.08E-03 |
| GO:0010633 | negative regulation of epithelial cell migration                    | 5.08E-03 |
| GO:0017014 | protein nitrosylation                                               | 5.08E-03 |
| GO:0018076 | N-terminal peptidyl-lysine acetylation                              | 5.08E-03 |
| GO:0018119 | peptidyl-cysteine S-nitrosylation                                   | 5.08E-03 |
| GO:0019985 | translesion synthesis                                               | 5.08E-03 |
| GO:0021831 | embryonic olfactory bulb interneuron precursor migration            | 5.08E-03 |
| GO:0030301 | cholesterol transport                                               | 5.08E-03 |
| GO:0030952 | establishment or maintenance of cytoskeleton polarity               | 5.08E-03 |
| GO:0034983 | peptidyl-lysine deacetylation                                       | 5.08E-03 |
| GO:0044268 | multicellular organismal protein metabolic process                  | 5.08E-03 |
| GO:0051573 | negative regulation of histone H3-K9 methylation                    | 5.08E-03 |
| GO:0070305 | response to cGMP                                                    | 5.08E-03 |
| GO:0070932 | histone H3 deacetylation                                            | 5.08E-03 |
| GO:0071670 | smooth muscle cell chemotaxis                                       | 5.08E-03 |
| GO:0006312 | mitotic recombination                                               | 5.23E-03 |
| GO:0031929 | TOR signaling cascade                                               | 5.23E-03 |
| GO:0022603 | regulation of anatomical structure morphogenesis                    | 5.25E-03 |
| GO:0006812 | cation transport                                                    | 5.38E-03 |
| GO:0060284 | regulation of cell development                                      | 5.62E-03 |
| GO:0006282 | regulation of DNA repair                                            | 5.66E-03 |
| GO:0048513 | organ development                                                   | 5.75E-03 |
| GO:0001738 | morphogenesis of a polarized epithelium                             | 5.79E-03 |
| GO:0017156 | calcium ion-dependent exocytosis                                    | 5.90E-03 |
| GO:0015918 | sterol transport                                                    | 5.96E-03 |
| GO:0003081 | regulation of systemic arterial blood pressure by renin-angiotensin | 6.00E-03 |
| GO:0070207 | protein homotrimerization                                           | 6.00E-03 |
| GO:0030036 | actin cytoskeleton organization                                     | 6.17E-03 |
| GO:0010564 | regulation of cell cycle process                                    | 6.20E-03 |
| GO:0006865 | amino acid transport                                                | 6.25E-03 |
| GO:0046942 | carboxylic acid transport                                           | 6.54E-03 |
| GO:0048285 | organelle fission                                                   | 6.56E-03 |
| GO:0051656 | establishment of organelle localization                             | 6.70E-03 |

|            |                                                                      |          |
|------------|----------------------------------------------------------------------|----------|
| GO:0006801 | superoxide metabolic process                                         | 6.86E-03 |
| GO:0060415 | muscle tissue morphogenesis                                          | 7.03E-03 |
| GO:0030048 | actin filament-based movement                                        | 7.05E-03 |
| GO:0042632 | cholesterol homeostasis                                              | 7.05E-03 |
| GO:0055092 | sterol homeostasis                                                   | 7.05E-03 |
| GO:0009314 | response to radiation                                                | 7.09E-03 |
| GO:0007141 | male meiosis I                                                       | 7.26E-03 |
| GO:0015838 | betaine transport                                                    | 7.26E-03 |
| GO:0015879 | carnitine transport                                                  | 7.26E-03 |
| GO:0032371 | regulation of sterol transport                                       | 7.26E-03 |
| GO:0032374 | regulation of cholesterol transport                                  | 7.26E-03 |
| GO:0060601 | lateral sprouting from an epithelium                                 | 7.26E-03 |
| GO:0060041 | retina development in camera-type eye                                | 7.61E-03 |
| GO:0006793 | phosphorus metabolic process                                         | 7.69E-03 |
| GO:0006796 | phosphate-containing compound metabolic process                      | 7.69E-03 |
| GO:0015849 | organic acid transport                                               | 7.71E-03 |
| GO:0021826 | substrate-independent telencephalic tangential migration             | 7.76E-03 |
| GO:0021843 | substrate-independent telencephalic tangential interneuron migration | 7.76E-03 |
| GO:0043116 | negative regulation of vascular permeability                         | 7.76E-03 |
| GO:0046599 | regulation of centriole replication                                  | 7.76E-03 |
| GO:0048793 | pronephros development                                               | 7.76E-03 |
| GO:0050951 | sensory perception of temperature stimulus                           | 7.76E-03 |
| GO:0043414 | macromolecule methylation                                            | 8.04E-03 |
| GO:0055008 | cardiac muscle tissue morphogenesis                                  | 8.23E-03 |
| GO:0031589 | cell-substrate adhesion                                              | 8.26E-03 |
| GO:0015697 | quaternary ammonium group transport                                  | 8.40E-03 |
| GO:0031057 | negative regulation of histone modification                          | 8.40E-03 |
| GO:0051898 | negative regulation of protein kinase B signaling cascade            | 8.40E-03 |
| GO:0051493 | regulation of cytoskeleton organization                              | 8.42E-03 |
| GO:0032886 | regulation of microtubule-based process                              | 8.59E-03 |
| GO:0007169 | transmembrane receptor protein tyrosine kinase signaling pathway     | 8.69E-03 |
| GO:0051128 | regulation of cellular component organization                        | 8.94E-03 |
| GO:0051347 | positive regulation of transferase activity                          | 9.11E-03 |
| GO:0048812 | neuron projection morphogenesis                                      | 9.38E-03 |

GO:0021987 cerebral cortex development 9.62E-03  
 GO:0044085 cellular component biogenesis 9.63E-03  
 GO:0048731 system development 9.77E-03

**E**

| Neuronal Process                | Accession                                                                           | GO TERM                                                                 | Robin    | Canary   |
|---------------------------------|-------------------------------------------------------------------------------------|-------------------------------------------------------------------------|----------|----------|
| Development and Differentiation | GO:0048667                                                                          | cell morphogenesis involved in neuron differentiation                   | 1.50E-05 |          |
|                                 | GO:0007399                                                                          | nervous system development                                              | 8.05E-05 | 5.07E-03 |
|                                 | GO:0048666                                                                          | neuron development                                                      | 2.22E-04 | 2.81E-03 |
|                                 | GO:0030182                                                                          | neuron differentiation                                                  | 9.80E-04 |          |
|                                 | GO:0007420                                                                          | brain development                                                       | 1.57E-03 |          |
|                                 | GO:0007417                                                                          | central nervous system development                                      | 3.78E-03 |          |
|                                 | GO:0021772                                                                          | olfactory bulb development                                              | 5.53E-03 |          |
|                                 | GO:0021988                                                                          | olfactory lobe development                                              | 5.53E-03 |          |
|                                 | GO:0021537                                                                          | telencephalon development                                               | 6.74E-03 |          |
|                                 | GO:0021987                                                                          | cerebral cortex development                                             |          | 9.62E-03 |
| Projection Development          | GO:0051960                                                                          | regulation of nervous system development                                |          | 1.14E-03 |
|                                 | GO:0048812                                                                          | neuron projection morphogenesis                                         | 5.21E-05 | 9.38E-03 |
|                                 | GO:0031175                                                                          | neuron projection development                                           | 2.03E-04 | 4.93E-03 |
|                                 | GO:0007409                                                                          | axonogenesis                                                            | 3.46E-04 |          |
|                                 | GO:0007411                                                                          | axon guidance                                                           | 3.91E-04 |          |
|                                 | GO:0008045                                                                          | motor axon guidance                                                     | 3.68E-03 |          |
|                                 | GO:0010975                                                                          | regulation of neuron projection development                             | 7.34E-03 |          |
|                                 | GO:0021952                                                                          | central nervous system projection neuron axonogenesis                   |          | 1.73E-03 |
| Neurogenesis                    | GO:0021955                                                                          | central nervous system neuron axonogenesis                              |          | 1.04E-03 |
|                                 | GO:0048841                                                                          | regulation of axon extension involved in axon guidance                  |          | 4.66E-03 |
|                                 | GO:0048699                                                                          | generation of neurons                                                   | 7.18E-04 |          |
|                                 | GO:0022008                                                                          | neurogenesis                                                            | 8.44E-04 |          |
|                                 | GO:0022029                                                                          | telencephalon cell migration                                            | 1.39E-03 | 1.54E-03 |
|                                 | GO:0021885                                                                          | forebrain cell migration                                                | 1.76E-03 | 2.61E-03 |
|                                 | GO:0022028                                                                          | tangential migration from the subventricular zone to the olfactory bulb | 4.99E-03 | 4.25E-03 |
|                                 | GO:0021826                                                                          | substrate-independent telencephalic tangential migration                |          | 7.76E-03 |
|                                 | GO:0021831                                                                          | embryonic olfactory bulb interneuron precursor migration                |          | 5.08E-03 |
| GO:0021834                      | chemorepulsion involved in embryonic olfactory bulb interneuron precursor migration |                                                                         | 1.43E-03 |          |
| GO:0021843                      | substrate-independent telencephalic tangential interneuron migration                |                                                                         | 7.76E-03 |          |
