# Supplementary material for: Regulatory mechanisms of testosterone-stimulated song in the sensorimotor nucleus HVC of female songbirds
Source: PubMed Central journal article supplement (PMC4261767; doi:10.1186/s12868-014-0128-0), 2014-12-02
Supplement: 12868_2014_128_MOESM8_ESM.pdf [file 12868_2014_128_MOESM8_ESM.pdf]

A

| Symbol  | References                         | Fold change |
|---------|------------------------------------|-------------|
| FADS2   | 6                                  | 3.14        |
| DNAJB5  | 10                                 | 2.33        |
| SV2B*   | 38                                 | 2.30        |
| GFRA1*  | 24                                 | 2.24        |
| NPY*    | 1,2,6,7,10,21,22,24,26,29,35,36,37 | 1.97        |
| RRAD*   | 24                                 | 1.95        |
| DUSP6*  | 10,24                              | 1.83        |
| IFRD1*  | 24                                 | 1.73        |
| NRN1    | 20,33                              | 1.72        |
| FOSL2*  | 1,17                               | 1.71        |
| NRP1*   | 24                                 | 1.71        |
| GRIN2A* | 5                                  | 1.68        |
| HMGCR*  | 28                                 | 1.68        |
| HOMER1* | 13                                 | 1.68        |
| TLL1*   | 38                                 | -1.66       |
| PRKG2*  | 31                                 | -1.68       |
| ZMIZ1*  | 33                                 | -1.68       |
| PER2*   | 10                                 | -1.69       |
| SCN2A*  | 8                                  | -1.96       |

B

| Symbol  | References    |
|---------|---------------|
| ARC     | 1,10,23,34,39 |
| ACVR1   | 24            |
| ADAM19  | 24            |
| ADCY8   | 24            |
| ADRB2   | 24            |
| AKAP1   | 31            |
| AKR1A1  | 38            |
| ANXA3   | 38            |
| ANXA5   | 38            |
| APOE    | 6             |
| ARC     | 13            |
| AREG    | 24            |
| ARL4A   | 34            |
| ARPP21  | 34            |
| ATP6    | 31            |
| ATP8    | 31            |
| BAI2    | 24            |
| BDNF    | 24            |
| BHLHE40 | 10            |
| BHLHE40 | 34            |

|         |               |
|---------|---------------|
| BTG2    | 24            |
| CCK     | 7             |
| CCND1   | 1             |
| CCND2   | 10            |
| CCNE1   | 38            |
| CD9     | 38            |
| CDKN1C  | 10            |
| CPD     | 38            |
| CREM    | 24            |
| CXCR4   | 24            |
| DCLK1   | 34            |
| DTX3L   | 34            |
| DUSP1   | 24            |
| EGR1    | 1,10,24       |
| EGR2    | 24            |
| ELOVL6  | 10            |
| ENO2    | 38            |
| FBL     | 34            |
| FGF10   | 38            |
| FOS     | 1,12,17,24,38 |
| FOSB    | 24            |
| GABRB3  | 24            |
| GAD1    | 19            |
| GALR2   | 38            |
| GAP43   | 17,38         |
| GNAL    | 31            |
| GNB2    | 38            |
| GNG2    | 24            |
| GRB14   | 10            |
| GRIA1   | 4             |
| GRIA2   | 4             |
| GRIN1   | 5             |
| GRIN2B  | 5             |
| GRIP1   | 15            |
| GSTK1   | 38            |
| GSTP1   | 38            |
| HIVEP1  | 10            |
| HSD11B1 | 24            |
| IER2    | 24            |
| IGF2R   | 38            |
| IGFBP6  | 38            |
| IL17RA  | 24            |
| INHBB   | 10            |
| ITPKA   | 38            |
| JUN     | 38            |
| JUNB    | 17,24         |
| JUND    | 38            |

|          |       |
|----------|-------|
| KCNA1    | 1     |
| KCNIP2   | 10    |
| KCNJ5    | 38    |
| KLF10    | 24,34 |
| LHX5     | 38    |
| LYPLA2   | 24    |
| MAP2K3   | 24    |
| MAP3K5   | 24    |
| MAS1     | 24    |
| MED16    | 34    |
| MEF2C    | 18,33 |
| MIF      | 38    |
| MMP14    | 6     |
| MMP2     | 27    |
| MMP3     | 24    |
| MMP9     | 27    |
| MVD      | 28    |
| MX1      | 31    |
| NEFL     | 24    |
| NPR1     | 31    |
| NPTX1    | 24    |
| NPTX2    | 34    |
| NR4A1    | 24    |
| NR4A2    | 24    |
| NTRK2    | 16    |
| NTSR2    | 38    |
| NUSAP1   | 24    |
| P4HA1    | 10    |
| PAFAH1B2 | 24    |
| PALMD    | 24    |
| PDGFB    | 38    |
| PDYN     | 7     |
| PGAP2    | 38    |
| PI4K2A   | 24    |
| PICK1    | 15    |
| PJA2     | 38    |
| PLAT     | 9     |
| PLDN     | 31    |
| PMEPA1   | 34    |
| PNOC     | 24    |
| POR      | 38    |
| PPP1R15B | 24    |
| PPP3R2   | 38    |
| PRKAR1A  | 31    |
| PRKCB    | 24    |
| PSMA2    | 38    |
| PSMB1    | 38    |

|          |                 |
|----------|-----------------|
| PSMB2    | 38              |
| PSMB4    | 38              |
| PTPN1    | 1               |
| PTPN5    | 24              |
| PTPRG    | 24              |
| PTPRN    | 24              |
| RAB2B    | 24              |
| RAB3A    | 31              |
| RAB3D    | 38              |
| RGS16    | 24              |
| RGS4     | 24              |
| RGS7BP   | 31              |
| RIOK3    | 31              |
| RPS11    | 38              |
| RYR2     | 24              |
| SC5DL    | 24              |
| SCG2     | 1,24,38         |
| SCNN1B   | 1               |
| SEPT9    | 24              |
| SERPINB2 | 9,24            |
| SFXN3    | 31              |
| SGK1     | 24              |
| SIAH2    | 24              |
| SLC12A5  | 25              |
| SLC18A1  | 38              |
| SLC20A1  | 24              |
| SLC2A3   | 3               |
| SLC2A3   | 24              |
| SLC6A1   | 19              |
| SLC6A8   | 24              |
| SLC9A1   | 38              |
| SLC9A2   | 38              |
| SNAP25   | 14,38           |
| SPTBN4   | 24              |
| SPTLC2   | 24              |
| SRXN1    | 34              |
| SST      | 6,7,10,21,22,24 |
| SSTR2    | 24              |
| SSTR4    | 1               |
| ST8SIA3  | 24              |
| STMN4    | 24              |
| STX1A    | 14              |
| SYNJ2    | 24              |
| SYP      | 30              |
| SYT1     | 30              |
| TAC1     | 7,22,24         |
| TAGLN3   | 24              |

|        |       |
|--------|-------|
| TIMP2  | 38    |
| TMSB10 | 10    |
| TNC    | 38    |
| TRH    | 11,32 |
| TRIB2  | 10    |
| TYMS   | 38    |
| TYRO3  | 24    |
| UNC5A  | 1     |
| VAMP1  | 30    |
| VEGF   | 1,6   |
| YWHAG  | 38    |
| YWHAQ  | 38    |
| YWHAZ  | 38    |

References used for table S4:

<sup>1</sup> Alder J, Thakker-Varia S, Bangasser DA, Kuroiwa M, Plummer MR, Shors TJ, Black IB: **Brain-derived neurotrophic factor-induced gene expression reveals novel actions of VGF in hippocampal synaptic plasticity.** *J Neurosci* 2003; 23:10800-10808.

<sup>2</sup> Barnea A, Roberts J: **Induction of functional and morphological expression of neuropeptide Y (NPY) in cortical cultures by brain-derived neurotrophic factor (BDNF): evidence for a requirement for extracellular-regulated kinase (ERK)-dependent and ERK-independent mechanisms.** *Brain Res* 2001, 919:57-69.

<sup>3</sup> Burkhalter J, Fiumelli H, Allaman I, Chatton JY, Martin JL: **Brain-derived neurotrophic factor stimulates energy metabolism in developing cortical neurons.** *J Neurosci* 2003, 23:8212-8220.

<sup>4</sup> Caldeira MV, Melo CV, Pereira DB, Carvalho RF, Carvalho AL, Duarte CB: **BDNF regulates the expression and traffic of NMDA receptors in cultured hippocampal neurons.** *Mol Cell Neurosci* 2007, 35:208-219.

<sup>5</sup> Caldeira MV, Melo CV, Pereira DB, Carvalho R, Correia SS, Backos DS, Carvalho AL, Esteban JA, Duarte CB: **Brain-derived neurotrophic factor regulates the expression and synaptic delivery of alpha-amino-3-hydroxy-5-methyl-4-isoxazole propionic acid receptor subunits in hippocampal neurons.** *J Biol Chem* 2007, 282:12619-12628.

<sup>6</sup> Cazzin C, Mion S, Caldara F, Rimland JM, Domenici E: **Microarray analysis of cultured rat hippocampal neurons treated with brain derived neurotrophic factor.** *Mol Biol Rep* 2011, 38:983-990.

<sup>7</sup> Croll SD, Wiegand SJ, Anderson KD, Lindsay RM, Nawa H: **Regulation of neuropeptides in adult rat forebrain by the neurotrophins BDNF and NGF.** *Eur J Neurosci* 1994, 6:1343-1353.

<sup>8</sup> Fanger GR, Jones JR, Maue RA: **Differential regulation of neuronal sodium channel expression by endogenous and exogenous tyrosine kinase receptors expressed in rat pheochromocytoma cells.** *J Neurosci* 1995, 15:202-213.

<sup>9</sup> Fiumelli H, Jabaudon D, Magistretti PJ, Martin JL: **BDNF stimulates expression, activity and release of tissue-type plasminogen activator in mouse cortical neurons.** *Eur J Neurosci* 1999, 11:1639-1646.

<sup>10</sup> Glorioso C, Sabatini M, Unger T, Hashimoto T, Monteggia LM, Lewis DA, Mirnics K: **Specificity and timing of neocortical transcriptome changes in response to**

**BDNF gene ablation during embryogenesis or adulthood.** *Mol Psychiatry* 2006, 11:633-648.

<sup>11</sup> Guerra-Crespo M, Ubieta R, Joseph-Bravo P, Charli JL, Pérez-Martínez L: **BDNF increases the early expression of TRH mRNA in fetal TrkB+ hypothalamic neurons in primary culture.** *Eur J Neurosci* 2001, 14:483-494.

<sup>12</sup> Ip NY, Li Y, Yancopoulos GD, Lindsay RM: **Cultured hippocampal neurons show responses to BDNF, NT-3, and NT-4, but not NGF.** *J Neurosci* 1993, 13:3394-3405.

<sup>13</sup> Ji Y, Lu Y, Yang F, Shen W, Tang TT, Feng L, Duan S, Lu B: **Acute and gradual increases in BDNF concentration elicit distinct signaling and functions in neurons.** *Nat Neurosci* 2010, 13:302-309.

<sup>14</sup> Johnston AN, Clements MP, Rose SP: **Role of brain-derived neurotrophic factor and presynaptic proteins in passive avoidance learning in day-old domestic chicks.** *Neuroscience* 1999, 88:1033-1042.

<sup>15</sup> Jourdi H, Iwakura Y, Narisawa-Saito M, Ibaraki K, Xiong H, Watanabe M, Hayashi Y, Takei N, Nawa H: **Brain-derived neurotrophic factor signal enhances and maintains the expression of AMPA receptor-associated PDZ proteins in developing cortical neurons.** *Dev Biol* 2003, 263:216-230.

<sup>16</sup> Kitagawa A, Nakayama T, Takenaga M, Matsumoto K, Tokura Y, Ohta Y, Ichinohe M, Yamaguchi Y, Suzuki N, Okano H, Igarashi R: **Lecithinized brain-derived**

**neurotrophic factor promotes the differentiation of embryonic stem cells in vitro and in vivo.** *Biochem Biophys Res Commun* 2005, 328:1051-1057.

<sup>17</sup> Koponen E, Lakso M, Castrén E: **Overexpression of the full-length neurotrophin receptor trkB regulates the expression of plasticity-related genes in mouse brain.** *Brain Res Mol Brain Res* 2004, 130:81-94.

<sup>18</sup> Liu L, Cavanaugh JE, Wang Y, Sakagami H, Mao Z, Xia Z: **ERK5 activation of MEF2-mediated gene expression plays a critical role in BDNF-promoted survival of developing but not mature cortical neurons.** *Proc Natl Acad Sci U S A* 2003, 100:8532-8537.

<sup>19</sup> Mizuno K, Carnahan J, Nawa H: **Brain-derived neurotrophic factor promotes differentiation of striatal GABAergic neurons.** *Dev Biol* 1994, 165:243-256.

<sup>20</sup> Naeve GS, Ramakrishnan M, Kramer R, Hevroni D, Citri Y, Theill LE: **Neuritin: a gene induced by neural activity and neurotrophins that promotes neuritogenesis.** *Proc Natl Acad Sci U S A* 1997, 94:2648-2653.

<sup>21</sup> Nawa H, Bessho Y, Carnahan J, Nakanishi S, Mizuno K: **Regulation of neuropeptide expression in cultured cerebral cortical neurons by brain-derived neurotrophic factor.** *J Neurochem* 1993, 60:772-775.

<sup>22</sup> Nawa H, Pelleymounter MA, Carnahan J: **Intraventricular administration of BDNF increases neuropeptide expression in newborn rat brain.** *J Neurosci* 1994, 14:3751-3765.



- <sup>23</sup> Rao VR, Pintchovski SA, Chin J, Peebles CL, Mitra S, Finkbeiner S: **AMPA receptors regulate transcription of the plasticity-related immediate-early gene Arc.** *Nat Neurosci* 2006, 9:887-895.
- <sup>24</sup> Ring RH, Alder J, Fennell M, Kouranova E, Black IB, Thakker-Varia S: **Transcriptional profiling of brain-derived-neurotrophic factor-induced neuronal plasticity: a novel role for nociceptin in hippocampal neurite outgrowth.** *J Neurobiol* 2006, 66:361-377.
- <sup>25</sup> Rivera C, Li H, Thomas-Crusells J, Lahtinen H, Viitanen T, Nanobashvili A, Kokaia Z, Airaksinen MS, Voipio J, Kaila K, Saarma M: **BDNF-induced TrkB activation down-regulates the K<sup>+</sup>-Cl<sup>-</sup> cotransporter KCC2 and impairs neuronal Cl<sup>-</sup> extrusion.** *J Cell Biol* 2002, 159:747-752.
- <sup>26</sup> Scharfman HE, Goodman JH, Sollas AL, Croll SD: **Spontaneous limbic seizures after intrahippocampal infusion of brain-derived neurotrophic factor.** *Exp Neurol* 2002, 174:201-214.
- <sup>27</sup> Sun CY, Hu Y, Wang HF, He WJ, Wang YD, Wu T: **Brain-derived neurotrophic factor inducing angiogenesis through modulation of matrix-degrading proteases.** *Chin Med J (Engl)* 2006, 119:589-595.
- <sup>28</sup> Suzuki S, Kiyosue K, Hazama S, Ogura A, Kashihara M, Hara T, Koshimizu H, Kojima M: **Brain-derived neurotrophic factor regulates cholesterol metabolism for synapse development.** *J Neurosci* 2007, 27:6417-6427.

<sup>29</sup> Takei N, Sasaoka K, Higuchi H, Endo Y, Hatanaka H: **BDNF increases the expression of neuropeptide Y mRNA and promotes differentiation/maturation of neuropeptide Y-positive cultured cortical neurons from embryonic and postnatal rats.** *Brain Res Mol Brain Res* 1996, 37:283-289.

<sup>30</sup> Tartaglia N, Du J, Tyler WJ, Neale E, Pozzo-Miller L, Lu B: **Protein synthesis-dependent and -independent regulation of hippocampal synapses by brain-derived neurotrophic factor.** *J Biol Chem* 2001, 276:37585-37593.

<sup>31</sup> Thakker-Varia S, Alder J, Crozier RA, Plummer MR, Black IB: **Rab3A is required for brain-derived neurotrophic factor-induced synaptic plasticity: transcriptional analysis at the population and single-cell levels.** *J Neurosci* 2001, 21:6782-6790.

<sup>32</sup> Ubieta R, Uribe RM, González JA, García-Vázquez A, Pérez-Monter C, Pérez-Martínez L, Joseph-Bravo P, Charli JL: **BDNF up-regulates pre-pro-TRH mRNA expression in the fetal/neonatal paraventricular nucleus of the hypothalamus. Properties of the transduction pathway.** *Brain Res* 2007, 1174:28-38.

<sup>33</sup> Wang Y, Liu L, Xia Z: **Brain-derived neurotrophic factor stimulates the transcriptional and neuroprotective activity of myocyte-enhancer factor 2C through an ERK1/2-RSK2 signaling cascade.** *J Neurochem* 2007, 102:957-966.

<sup>34</sup> Wibrand K, Messaoudi E, Håvik B, Steenslid V, Løvlie R, Steen VM, Bramham CR: **Identification of genes co-upregulated with Arc during BDNF-induced long-**

**term potentiation in adult rat dentate gyrus in vivo.** *Eur J Neurosci* 2006, 23:1501-1511.

<sup>35</sup> Williams AG, Hargreaves AC, Gunn-Moore FJ, Tavaré JM: **Stimulation of neuropeptide Y gene expression by brain-derived neurotrophic factor requires both the phospholipase Cgamma and Shc binding sites on its receptor, TrkB.** *Biochem J* 1998, 333:505-509.

<sup>36</sup> Wirth MJ, Obst K, Wahle P: **NT-4/5 and LIF, but not NT-3 and BDNF, promote NPY mRNA expression in cortical neurons in the absence of spontaneous bioelectrical activity.** *Eur J Neurosci* 1998, 10:1457-1464.

<sup>37</sup> Wirth MJ, Patz S, Wahle P: **Transcellular induction of neuropeptide Y expression by NT4 and BDNF.** *Proc Natl Acad Sci U S A* 2005, 102:3064-3069.

<sup>38</sup> Yang Y, Xie Y, Chai H, Fan M, Liu S, Liu H, Bruce I, Wu W: **Microarray analysis of gene expression patterns in adult spinal motoneurons after different types of axonal injuries.** *Brain Res* 2006, 1075:1-12.

<sup>39</sup> Ying SW, Futter M, Rosenblum K, Webber MJ, Hunt SP, Bliss TV, Bramham CR: **Brain-derived neurotrophic factor induces long-term potentiation in intact adult hippocampus: requirement for ERK activation coupled to CREB and upregulation of Arc synthesis.** *J Neurosci* 2002, 22:1532-1540.
